# Supplementary material for: A conformational switch controlling the toxicity of the prion protein
Source: PubMed Central journal article supplement (PMC9371974; doi:10.1038/s41594-022-00814-7), 2022-08-10

# Extended Data Figure 3

| Page<br>14 | Figure     | Description                  |
|------------|------------|------------------------------|
| 1          | ED Fig. 3B | POM2, raw gel                |
| 2          | ED Fig. 3B | Pan actin, raw gel           |
| 3          | ED Fig. 3B | POM2, annotated, ladder      |
| 4          | ED Fig. 3B | Pan actin, annotated, ladder |
| 5          | ED Fig. 3C | peIF2a, raw gel              |
| 6          | ED Fig. 3C | eIF2a, raw gel               |
| 7          | ED Fig. 3C | Pan actin, raw gel           |
| 8          | ED Fig. 3C | peIF2a, annotated, ladder    |
| 9          | ED Fig. 3C | eIF2a, annotated, ladder     |
| 10         | ED Fig. 3C | Pan actin, annotated, ladder |
| 11         | ED Fig. 3E | mNG, raw gel                 |
| 12         | ED Fig. 3E | Pan actin, raw gel           |
| 13         | ED Fig. 3E | mNG, annotated, ladder       |
| 14         | ED Fig. 3E | Pan actin, annotated, ladder |

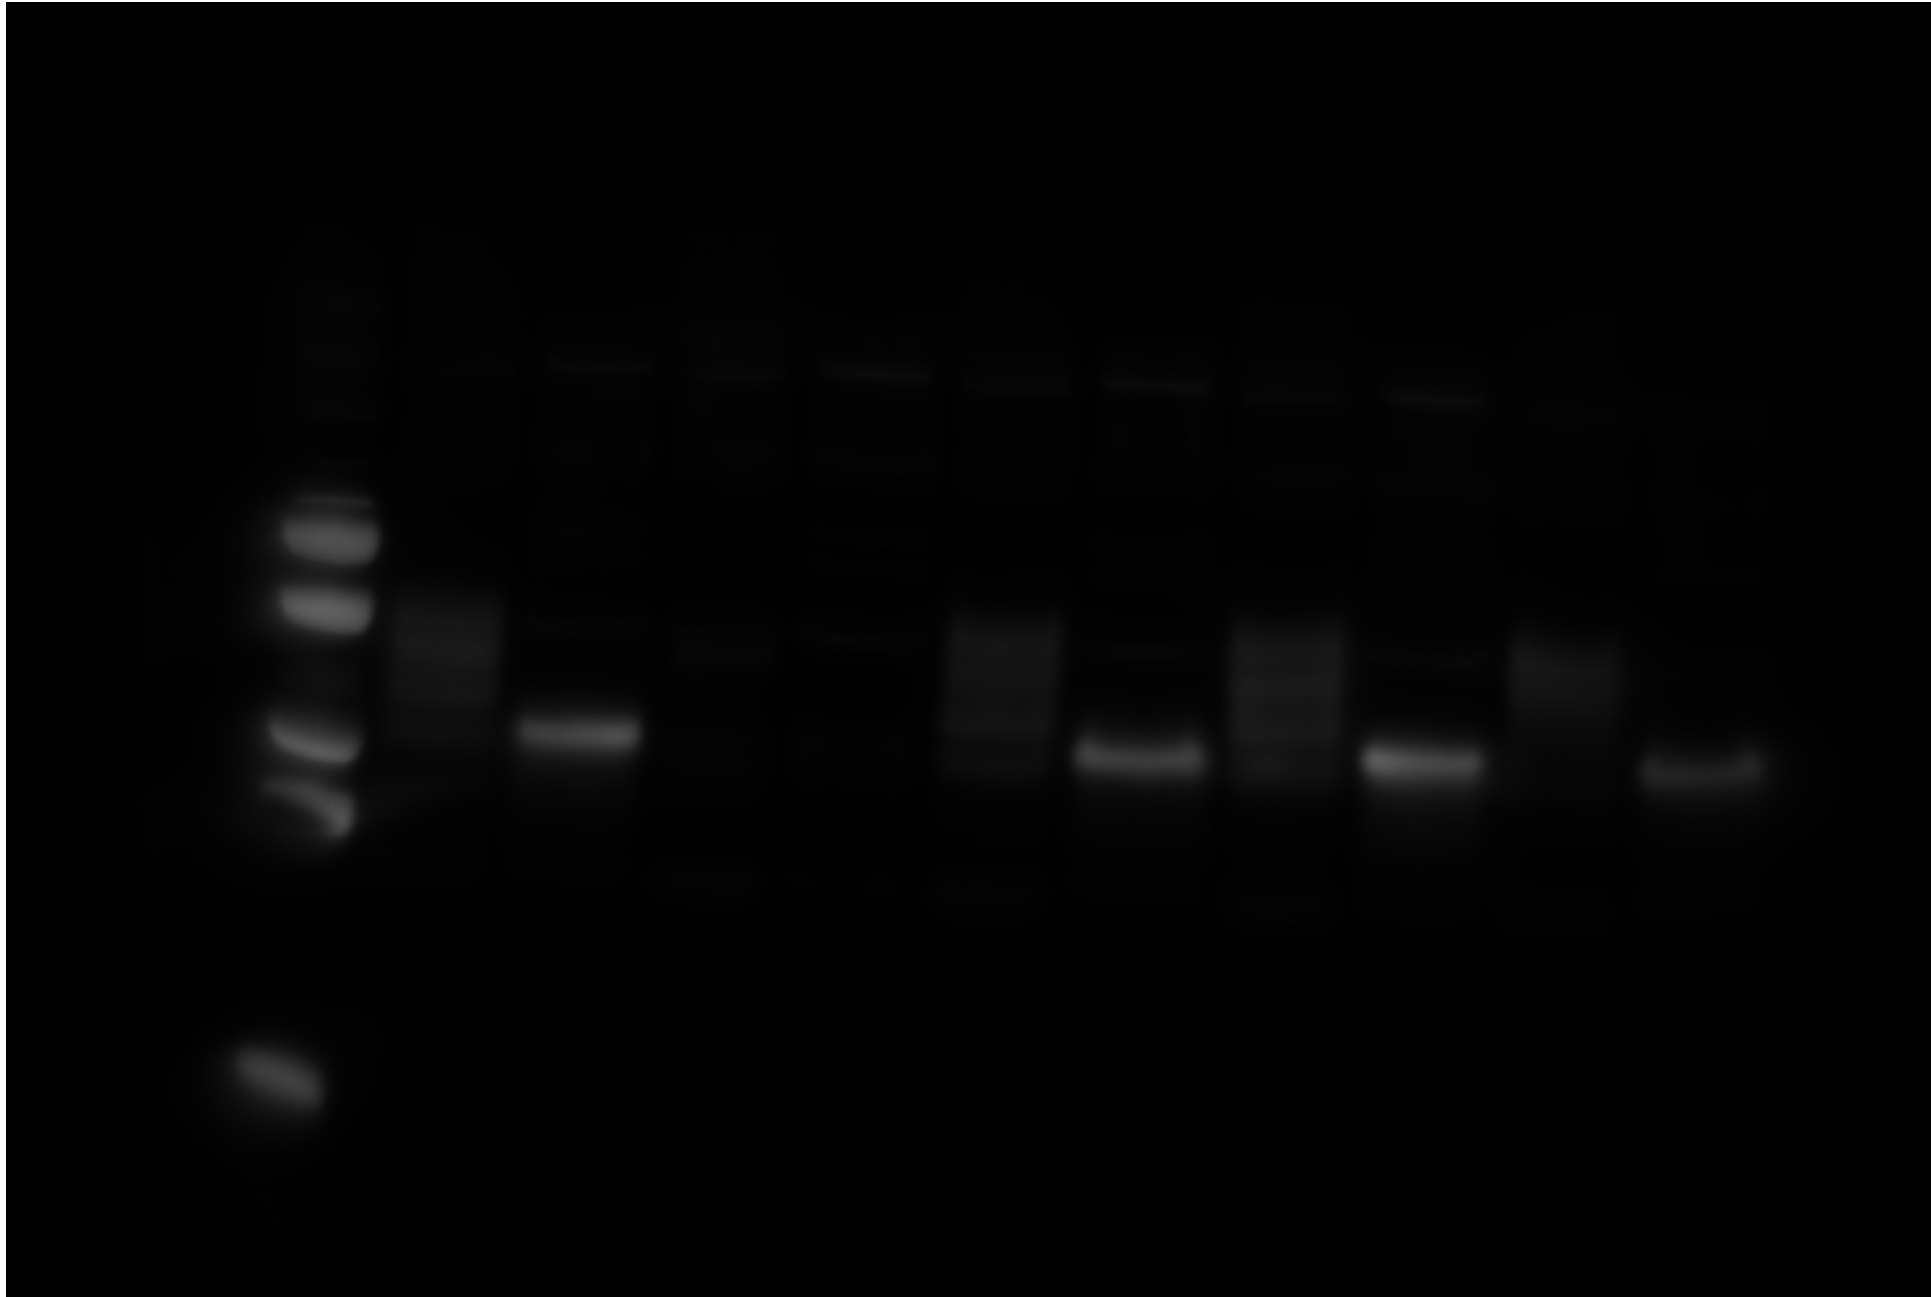

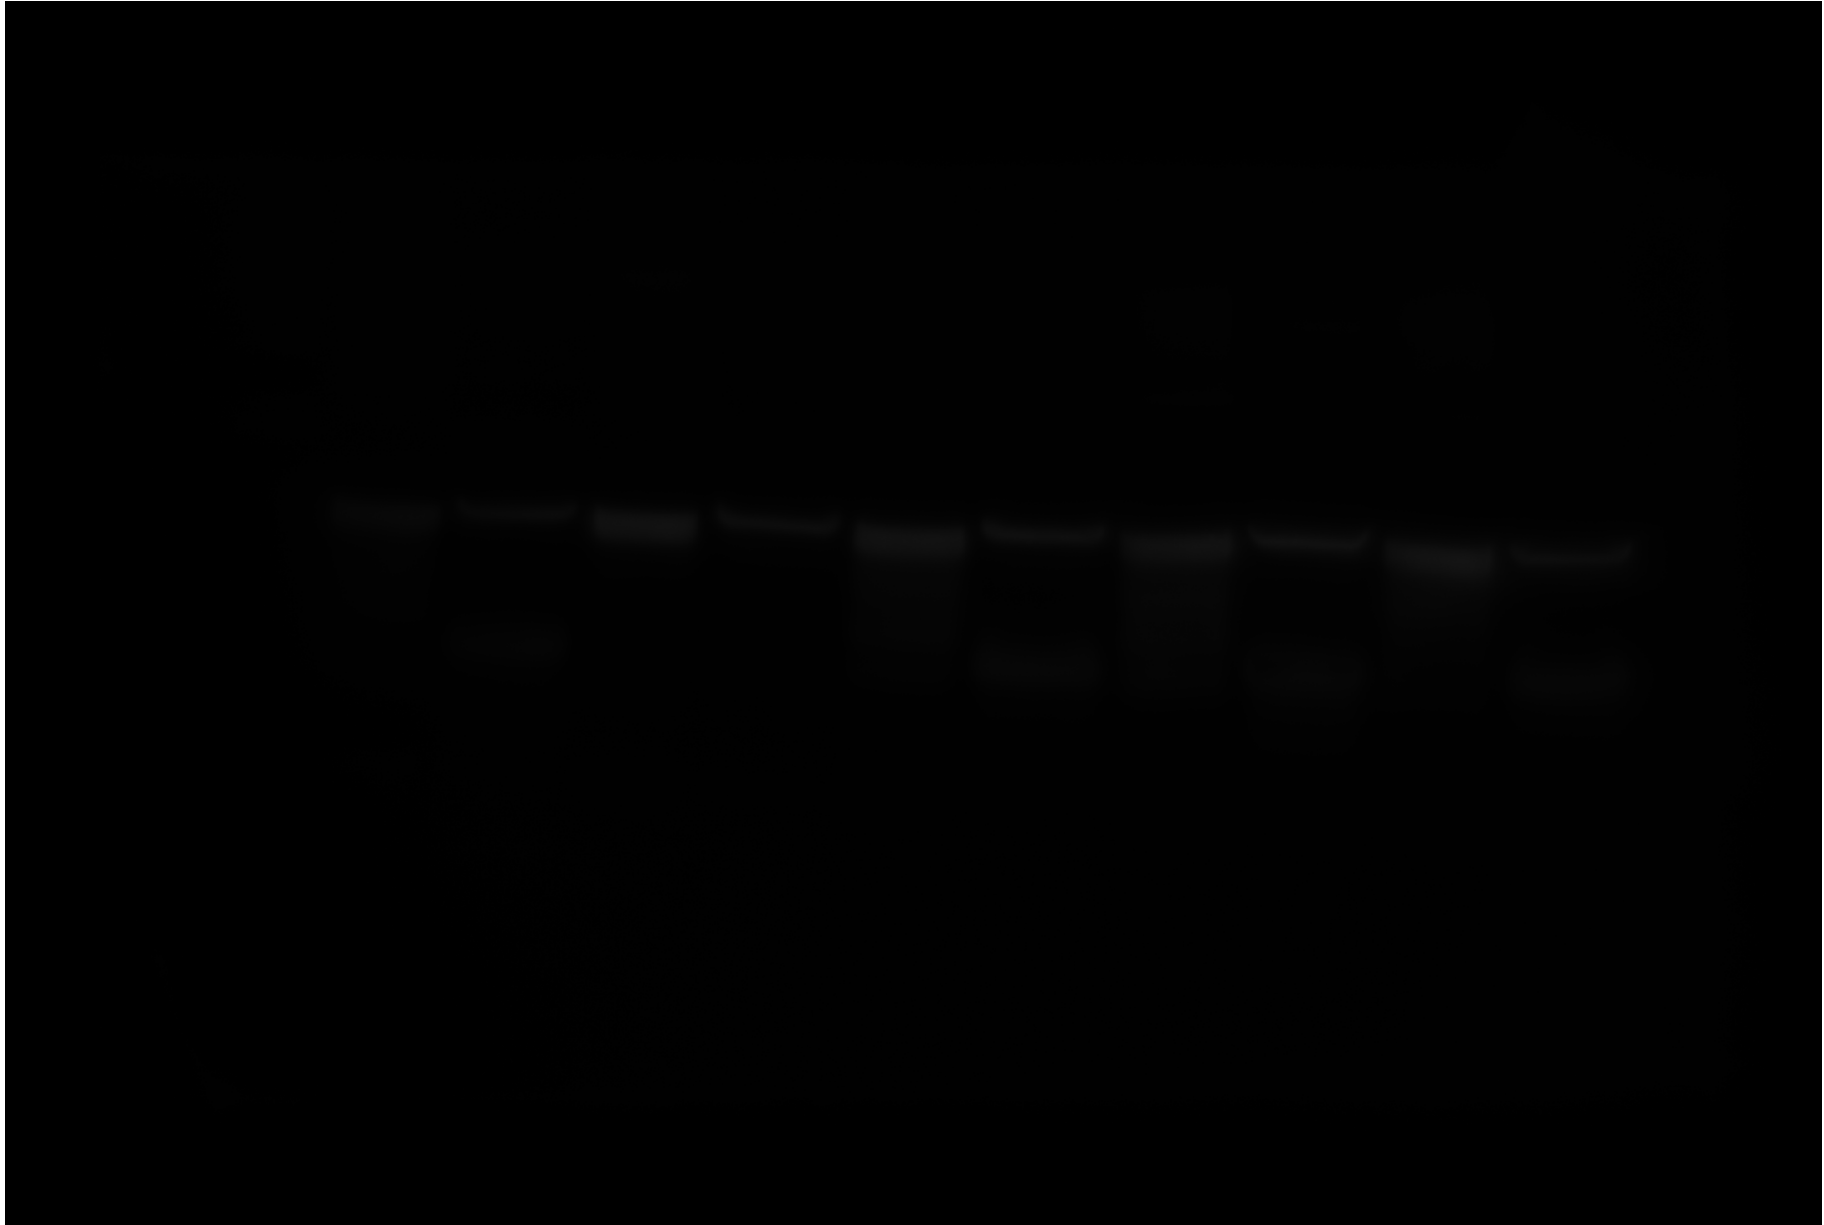

# ED Fig 3B – POM2

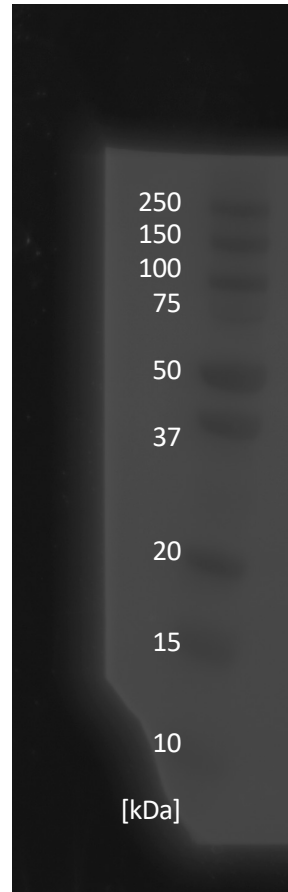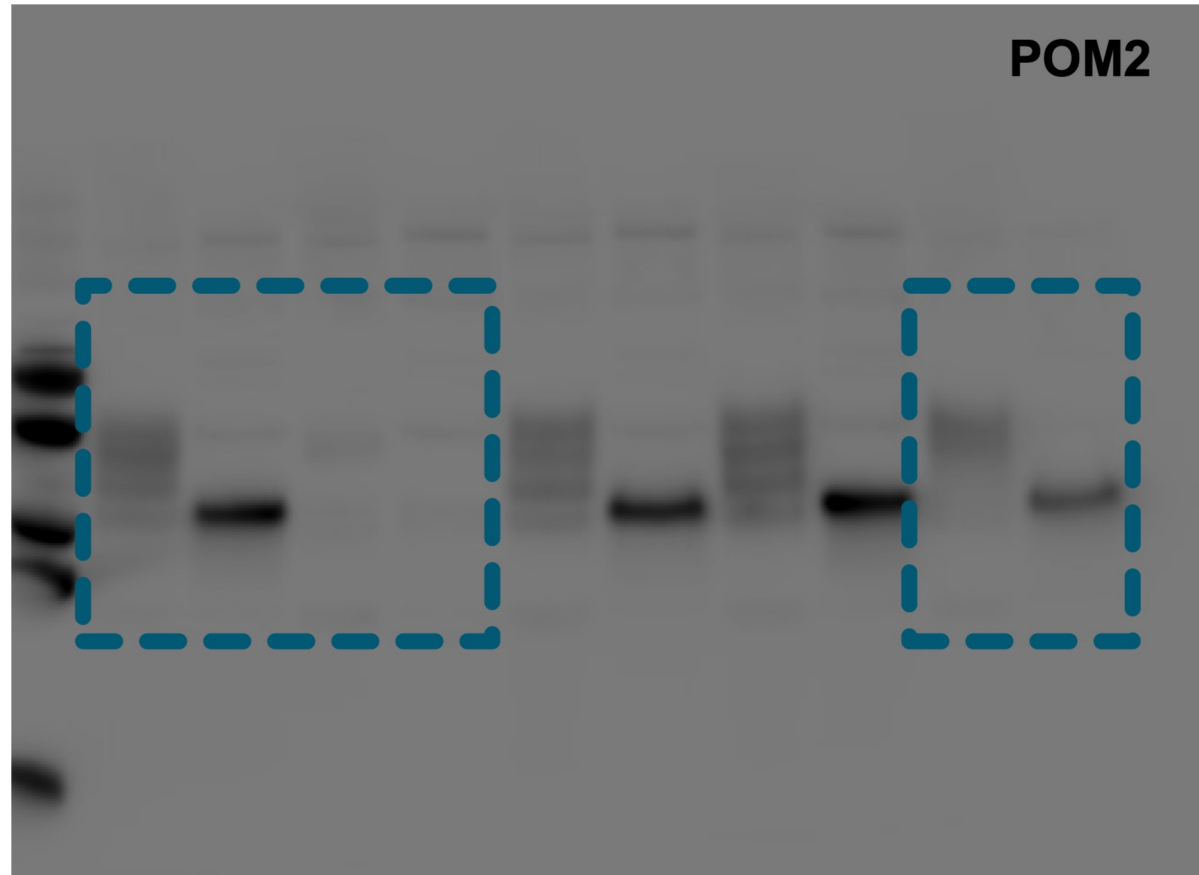

# ED Fig 3B - actin

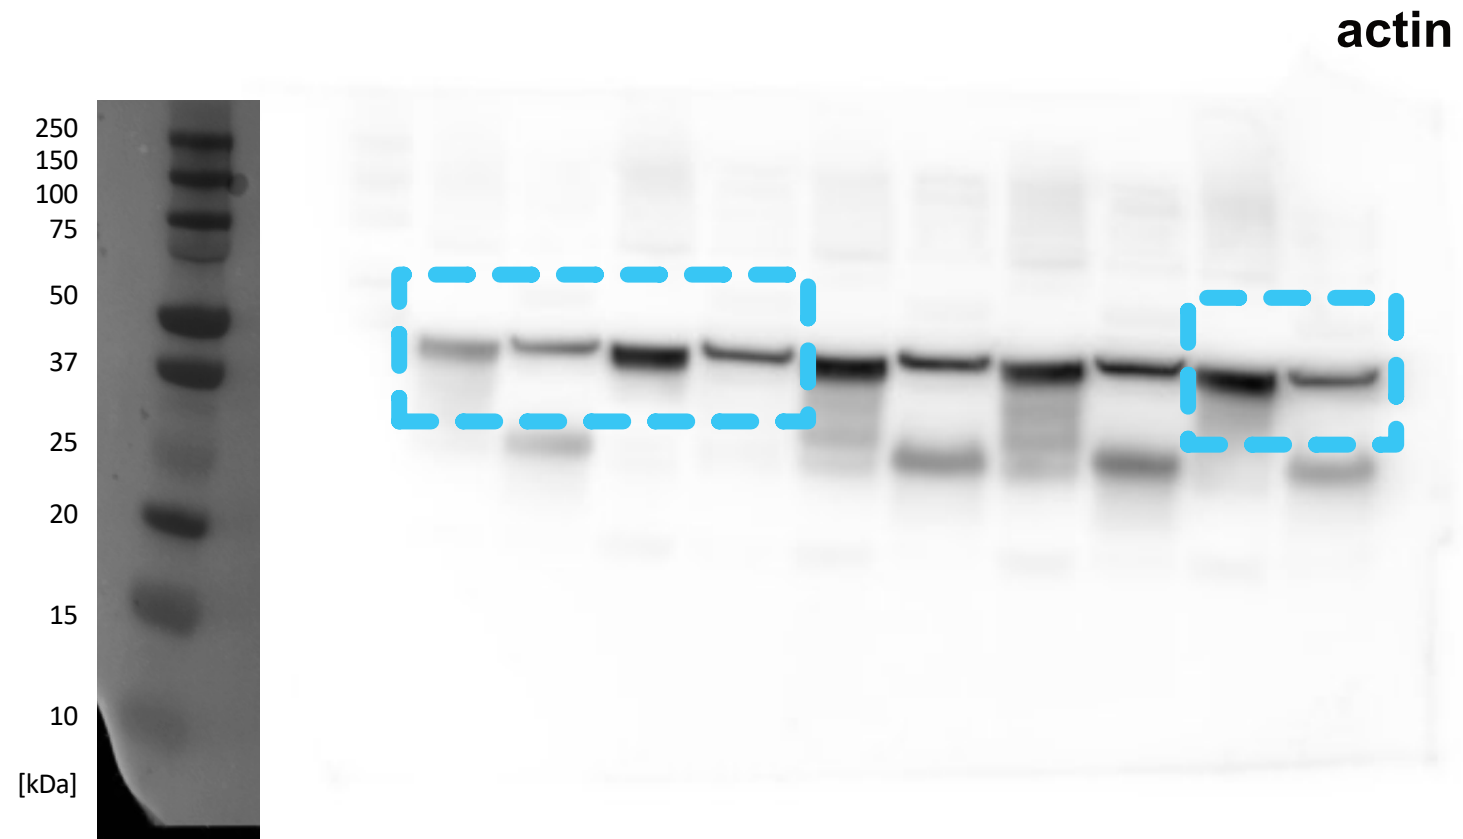

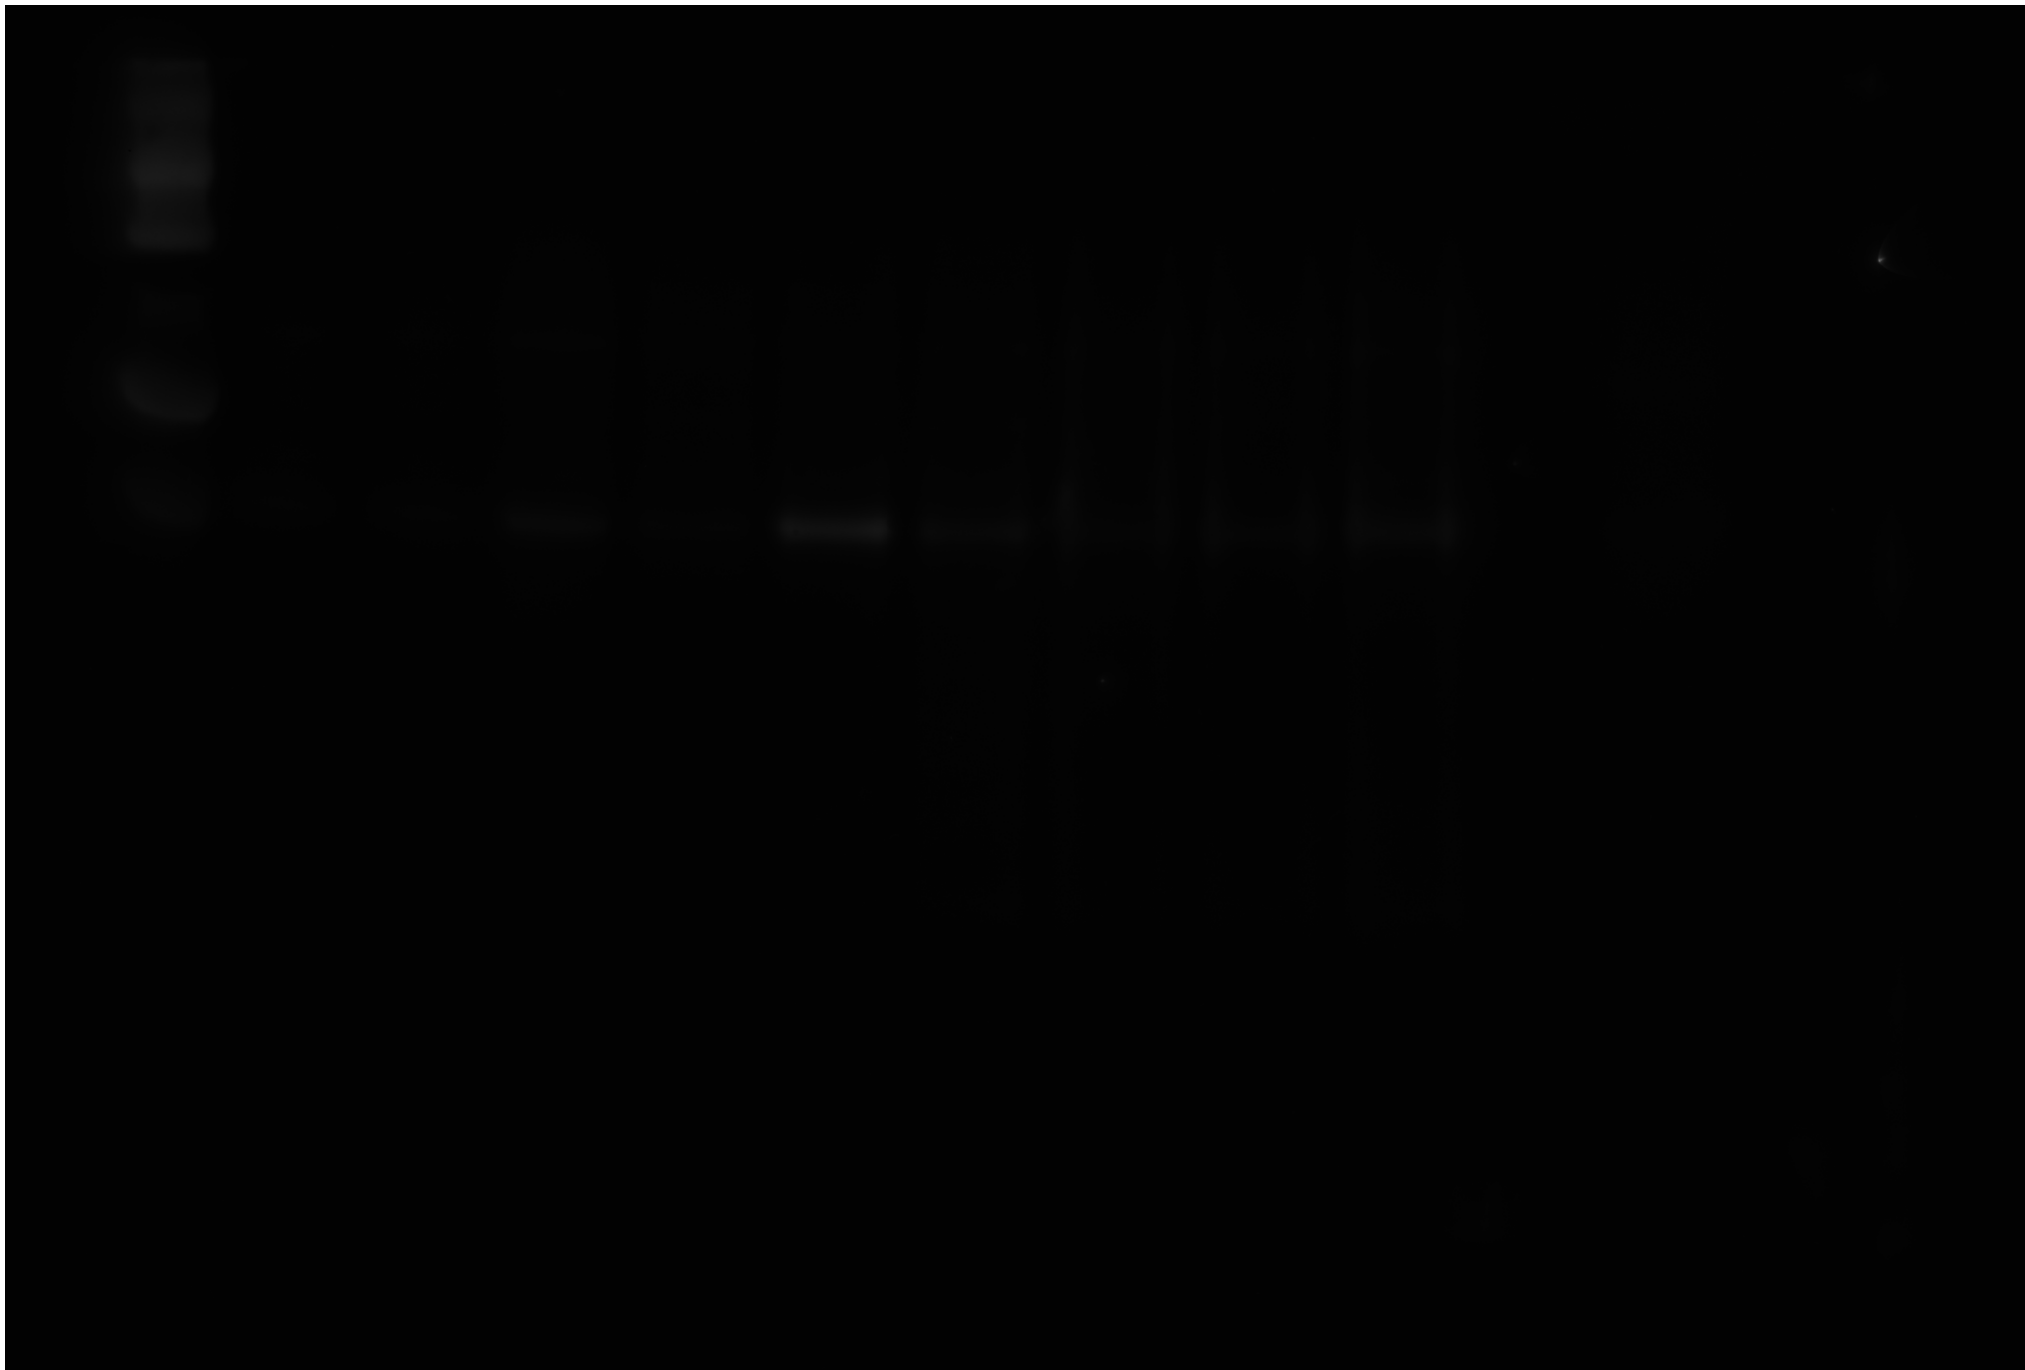

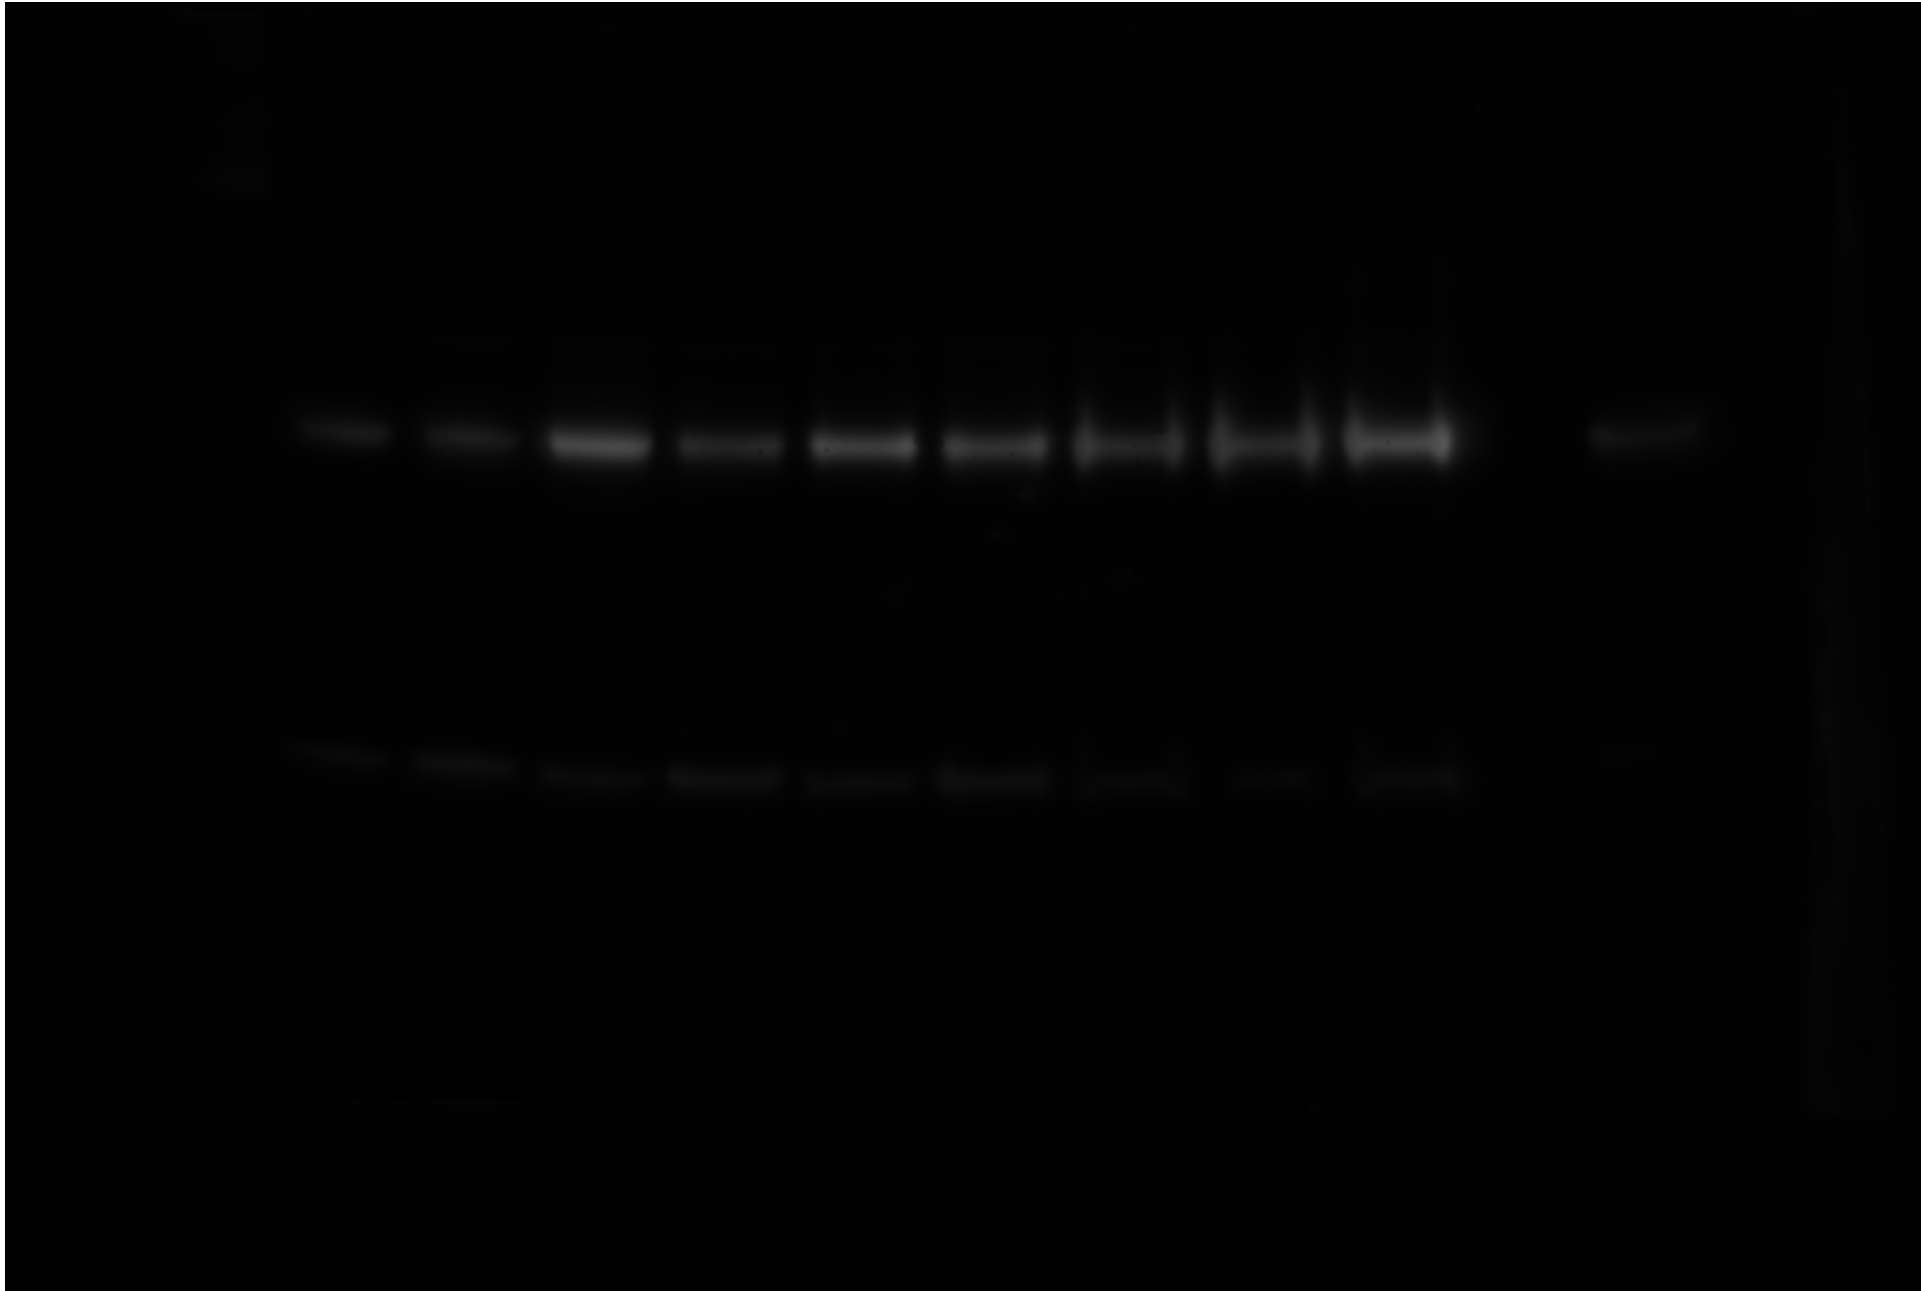

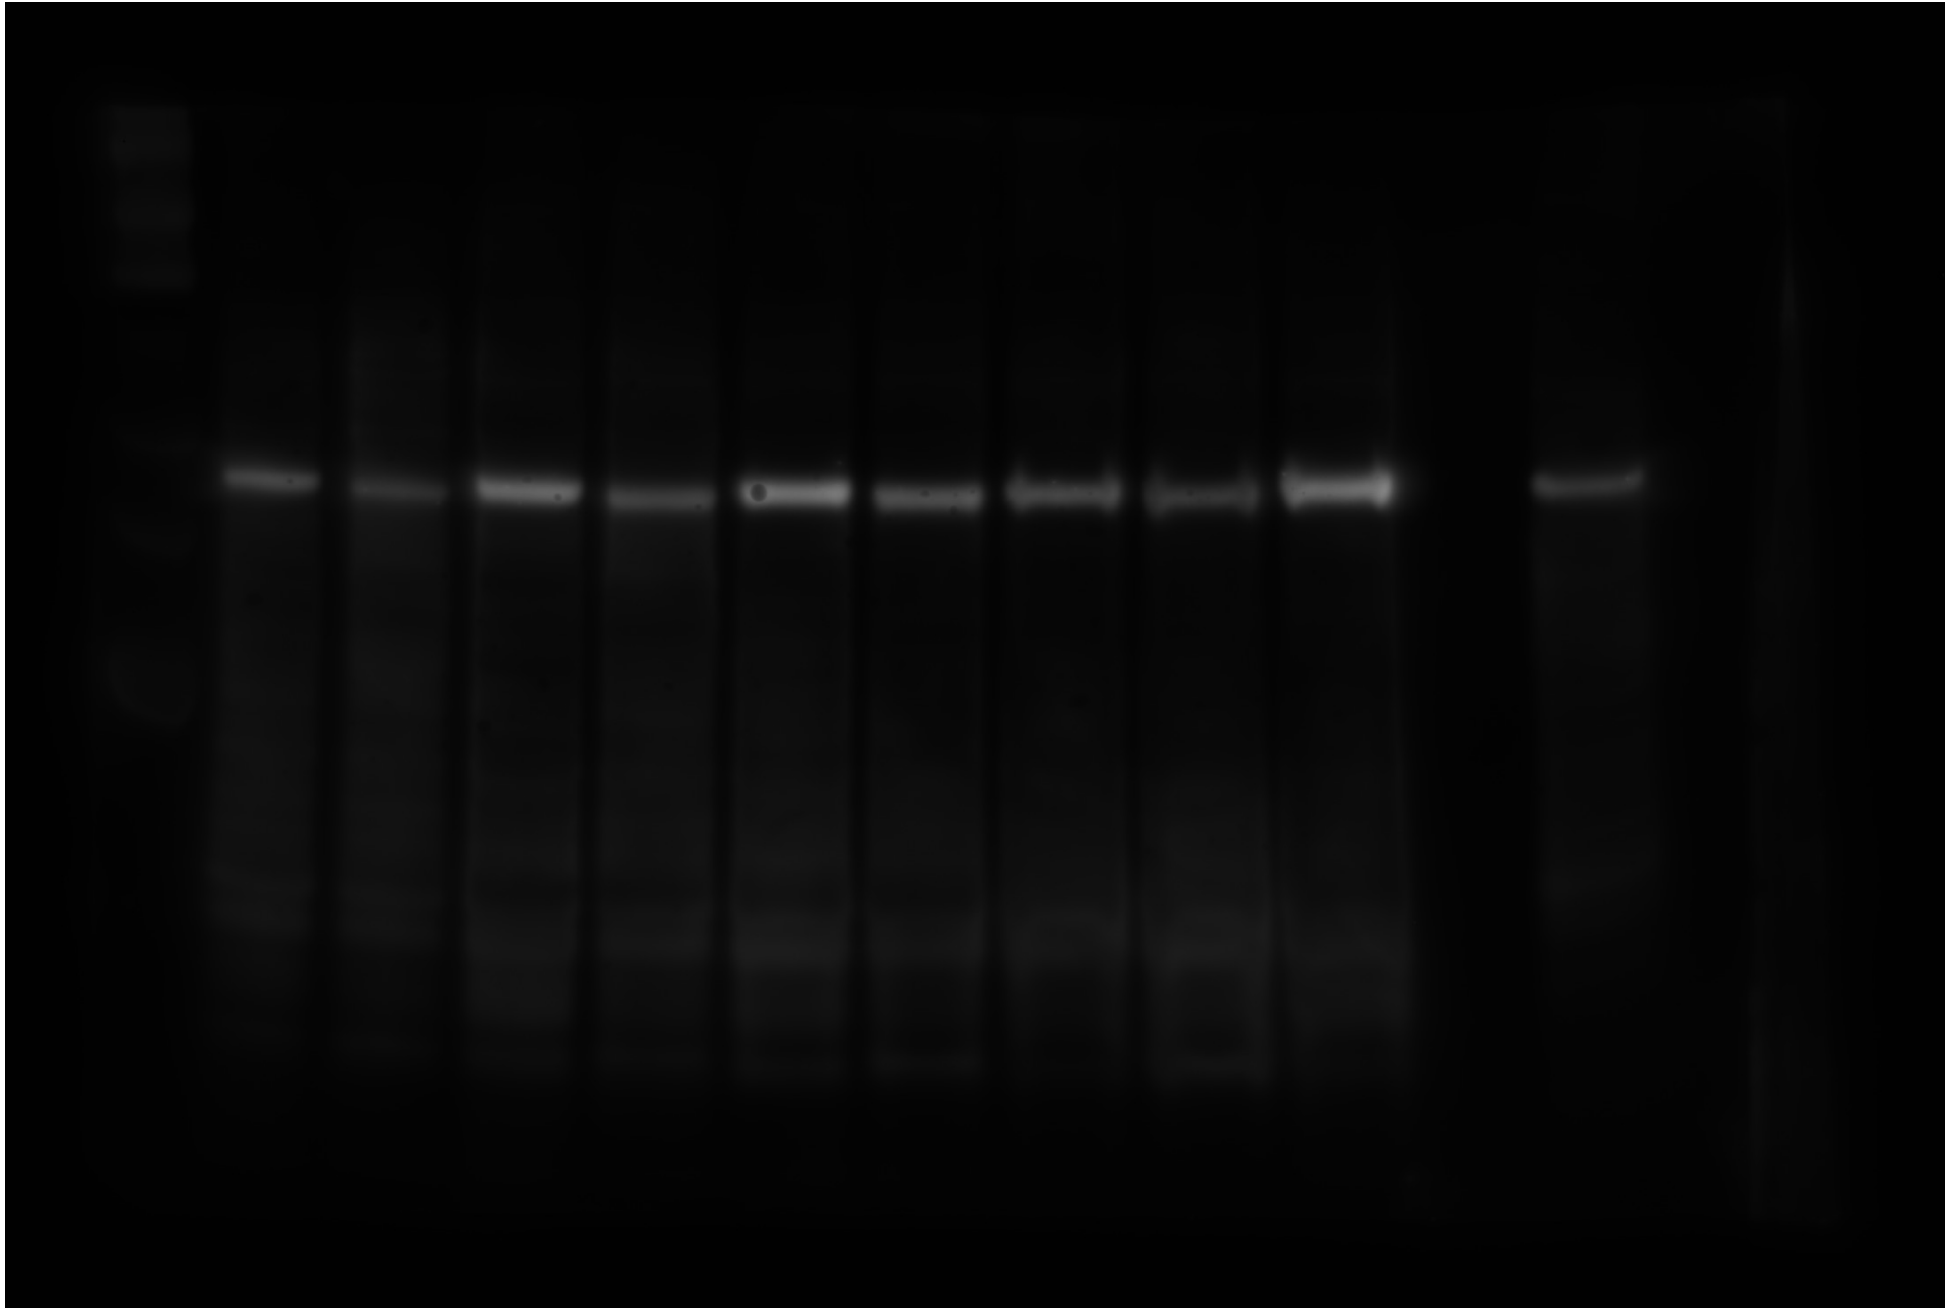



# ED Fig 3C – pelf2a

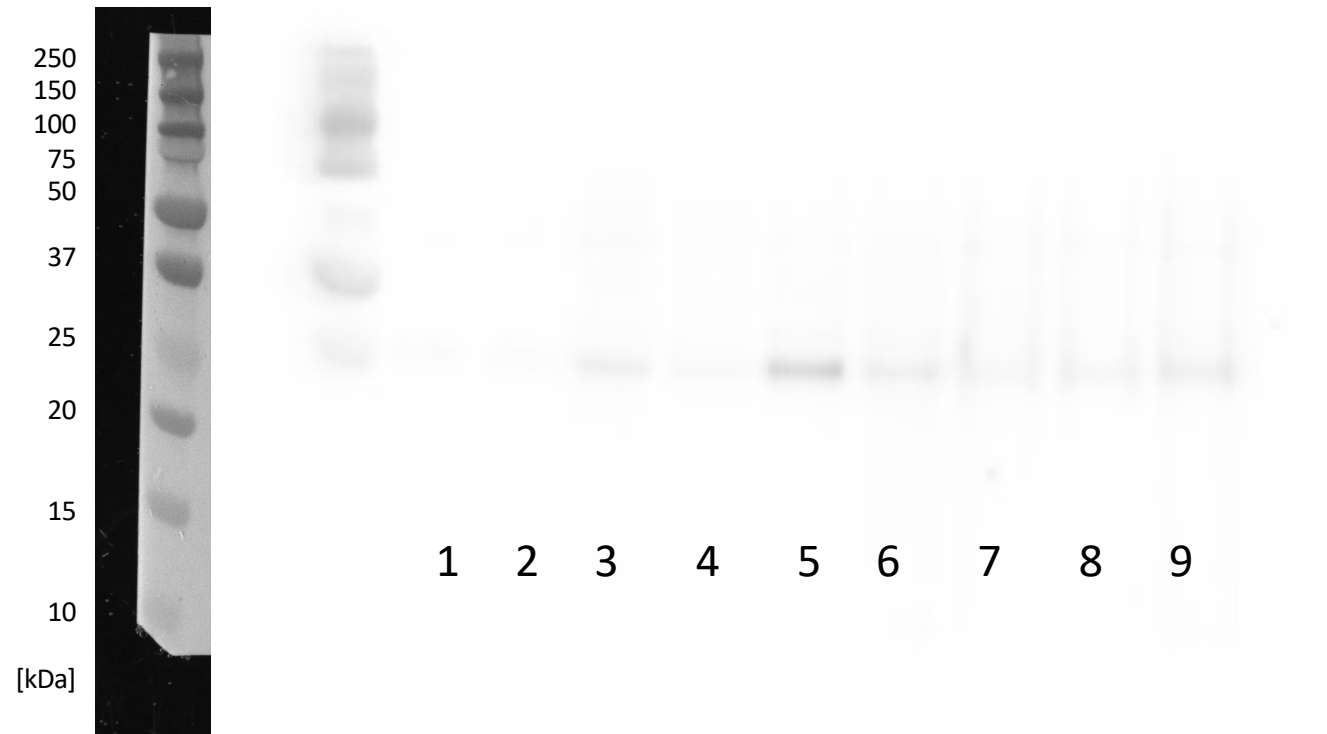

1-3 CAD5 + pcDNA3.1 empty ctrl  
4-6 CAD5 + pcDNA3.1 wt ctrl  
7-9 CAD5 + pcDNA3.1 I138C-R207C

# ED Fig 3C – eIF2 $\alpha$

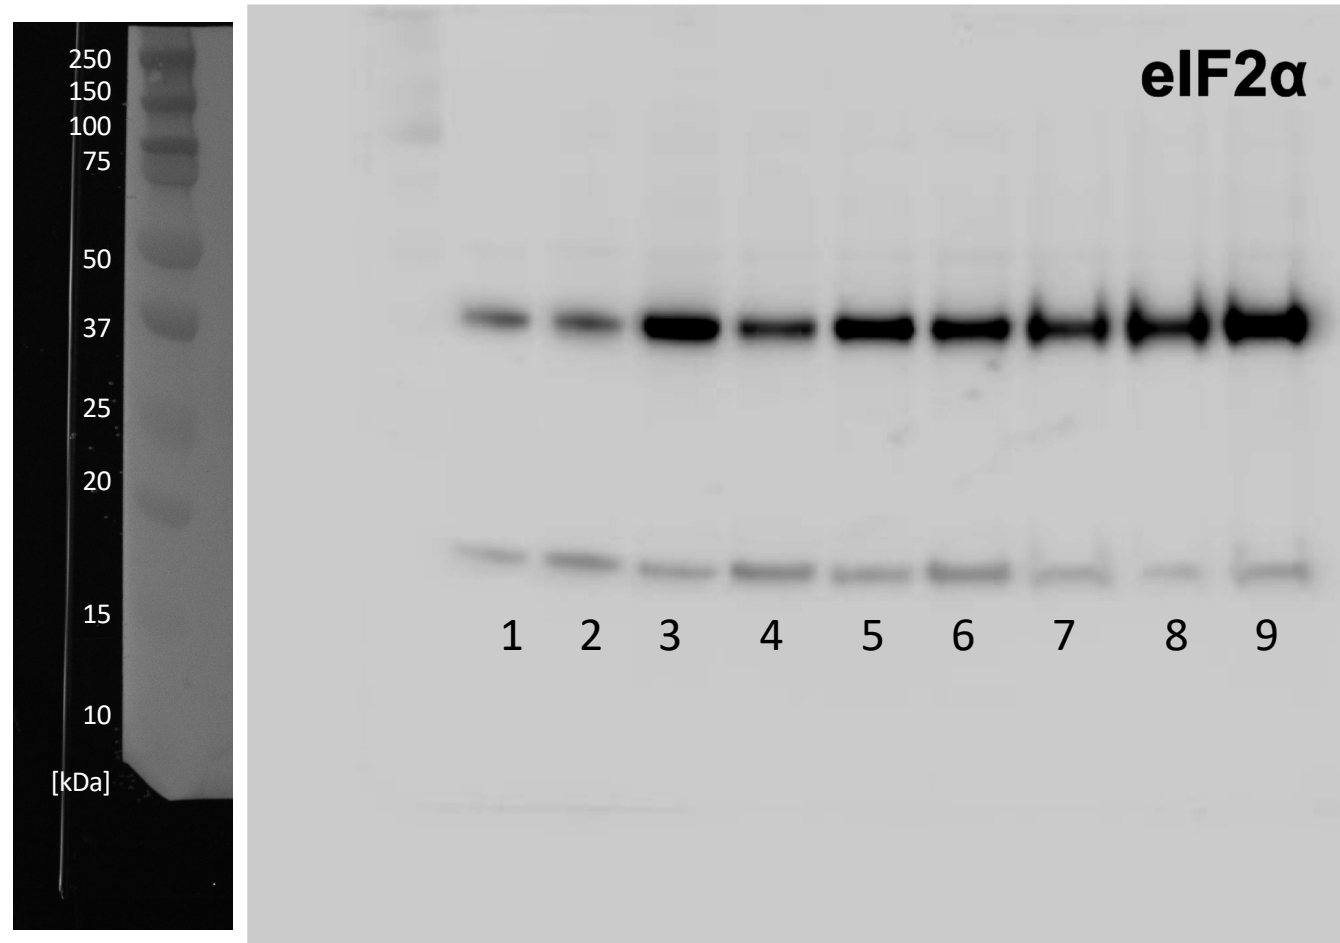

# ED Fig 3C

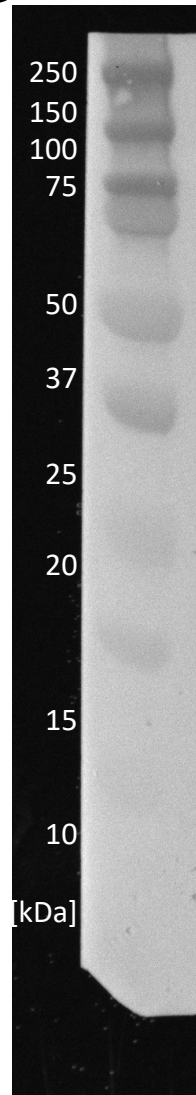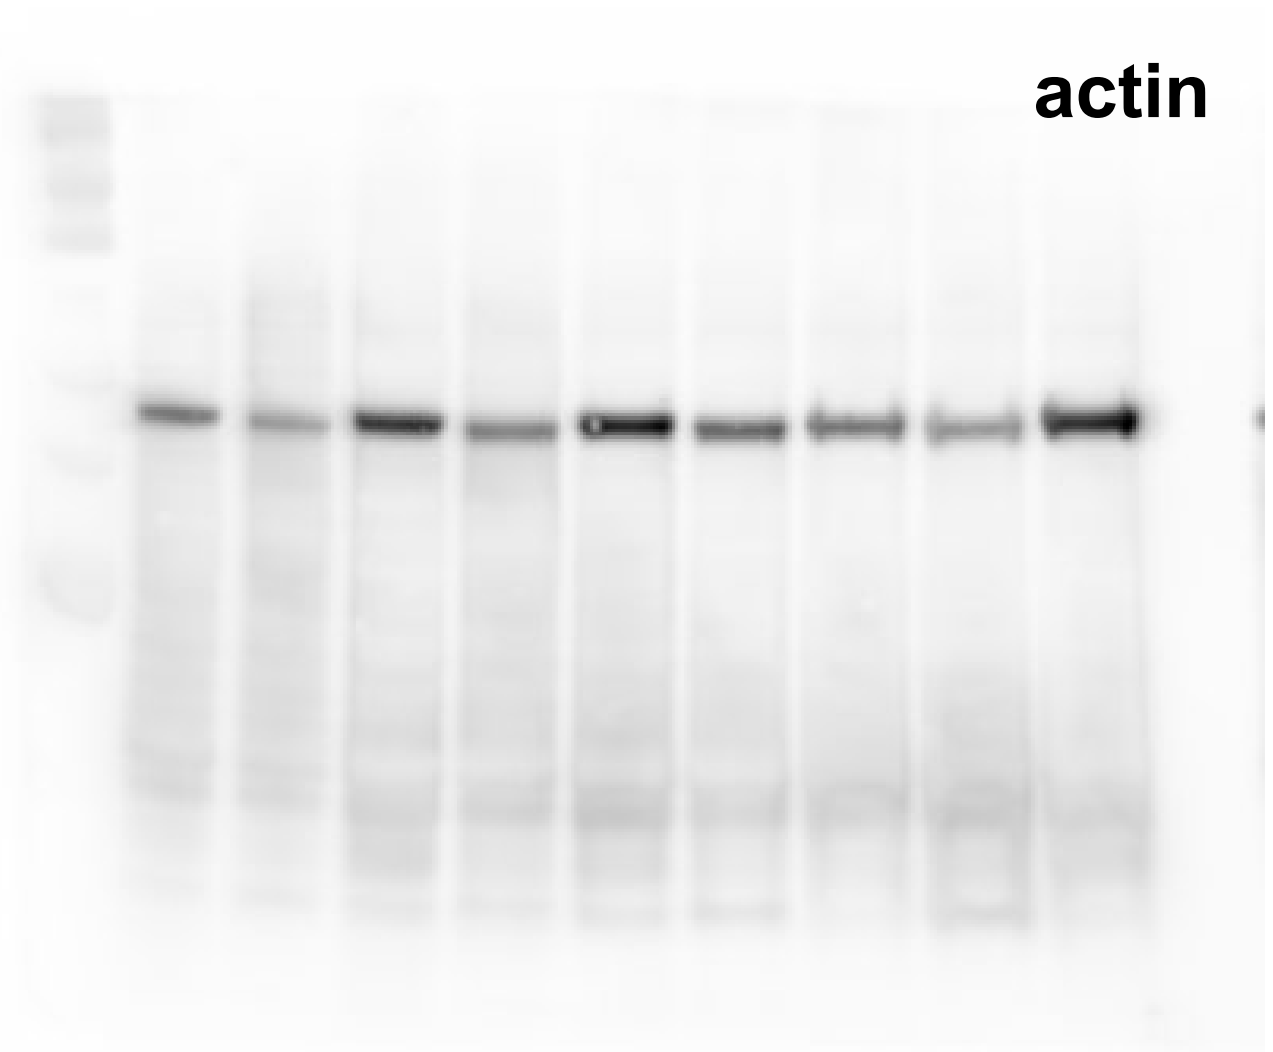

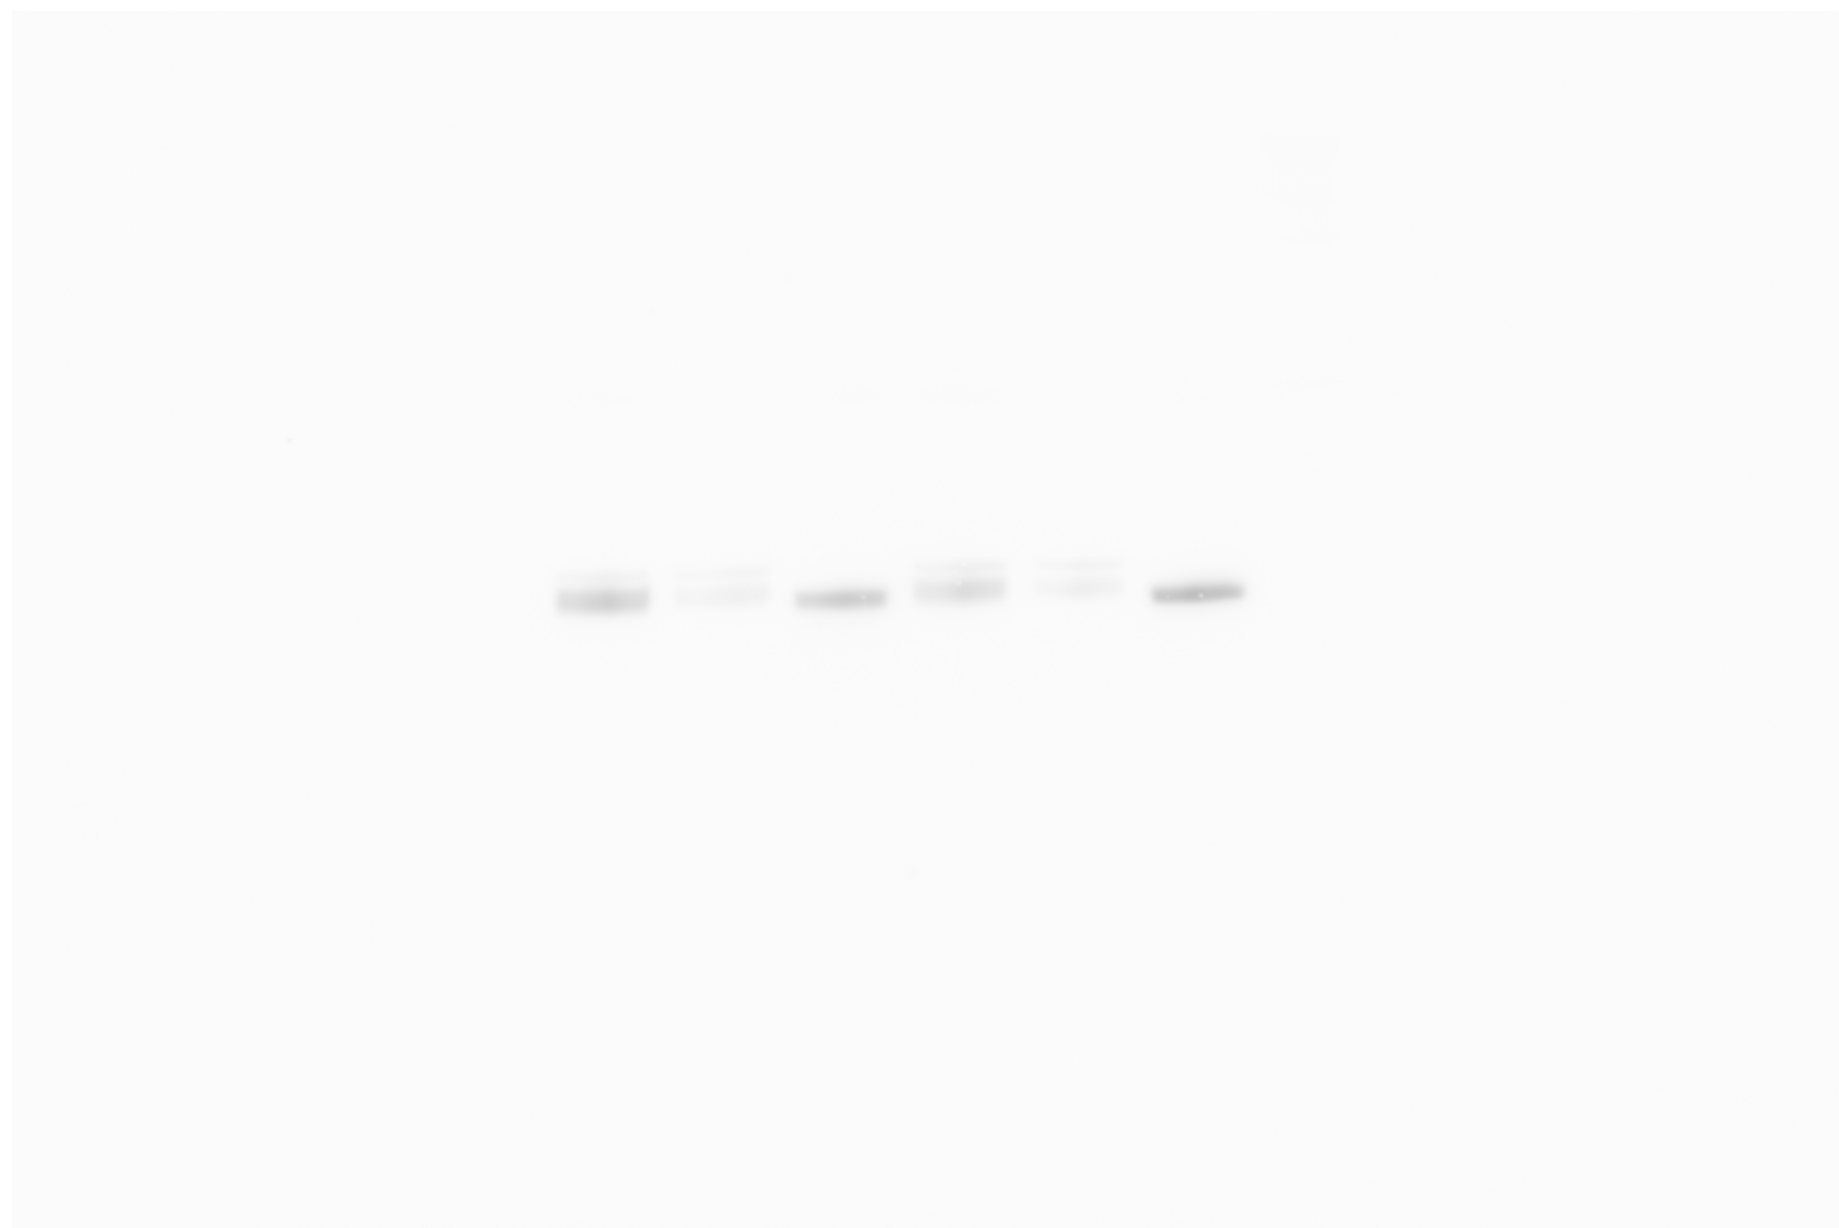

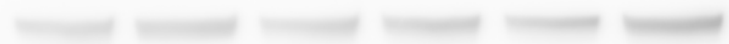

# ED Fig 3E – monomeric NeonGreen (mNG)

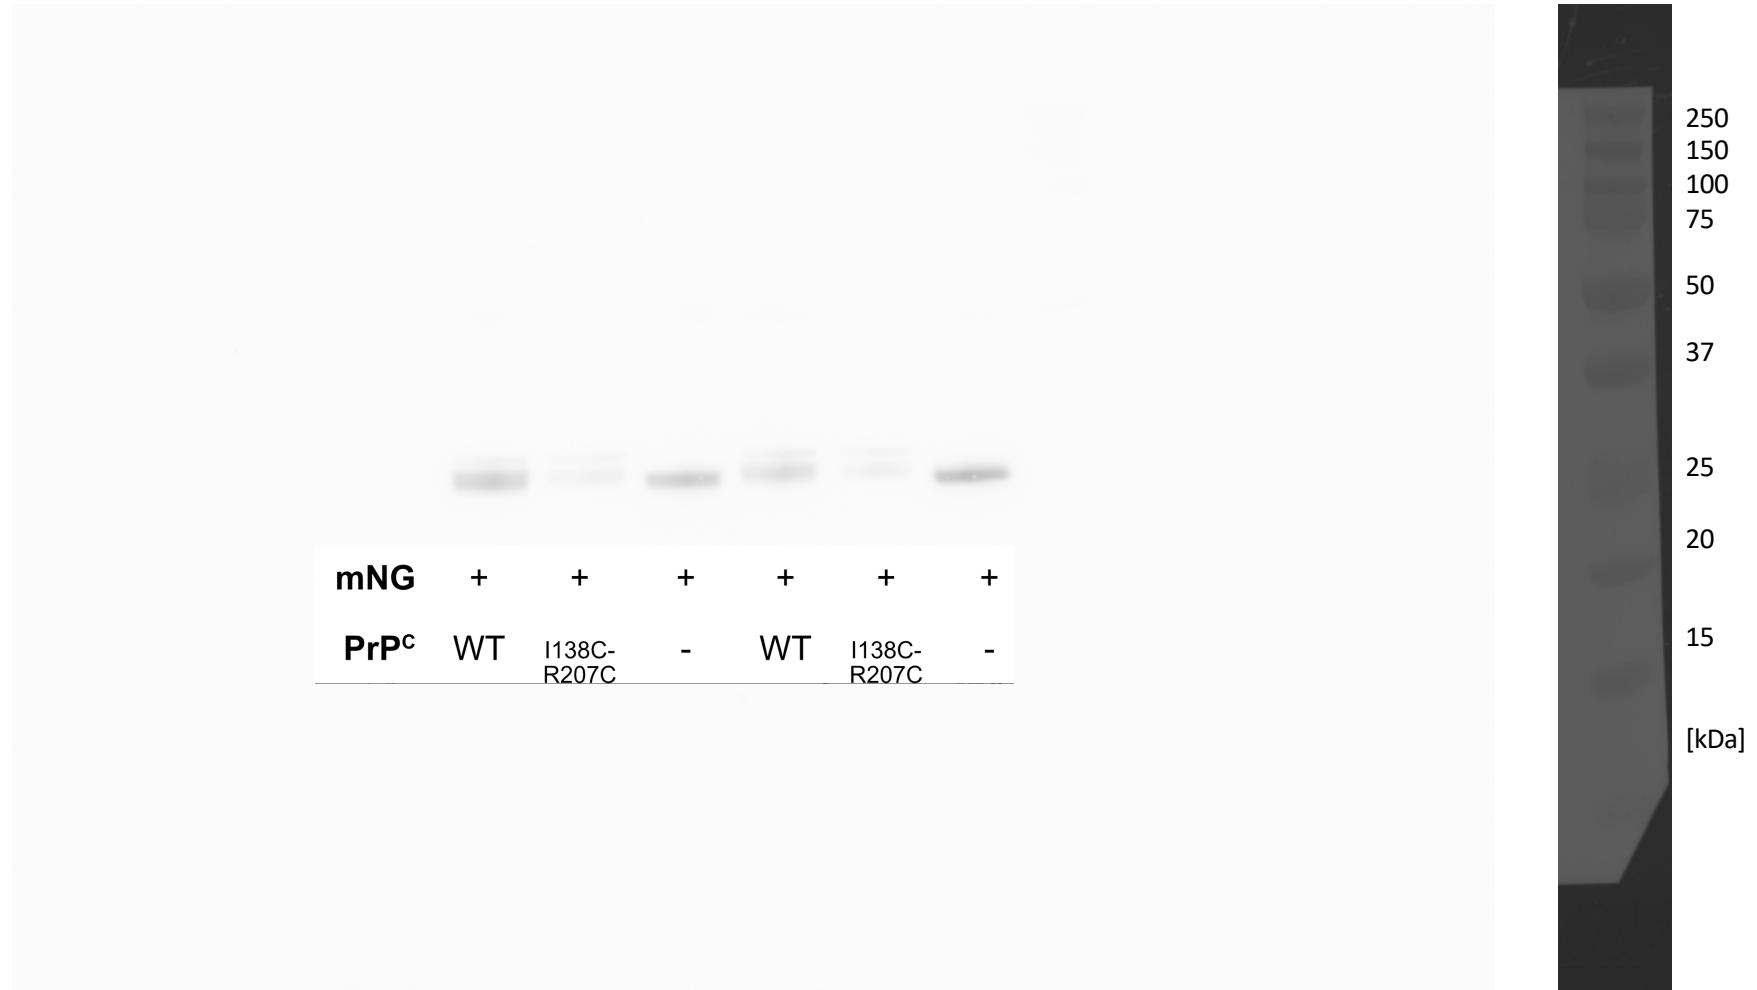

# ED Fig 3E – actin

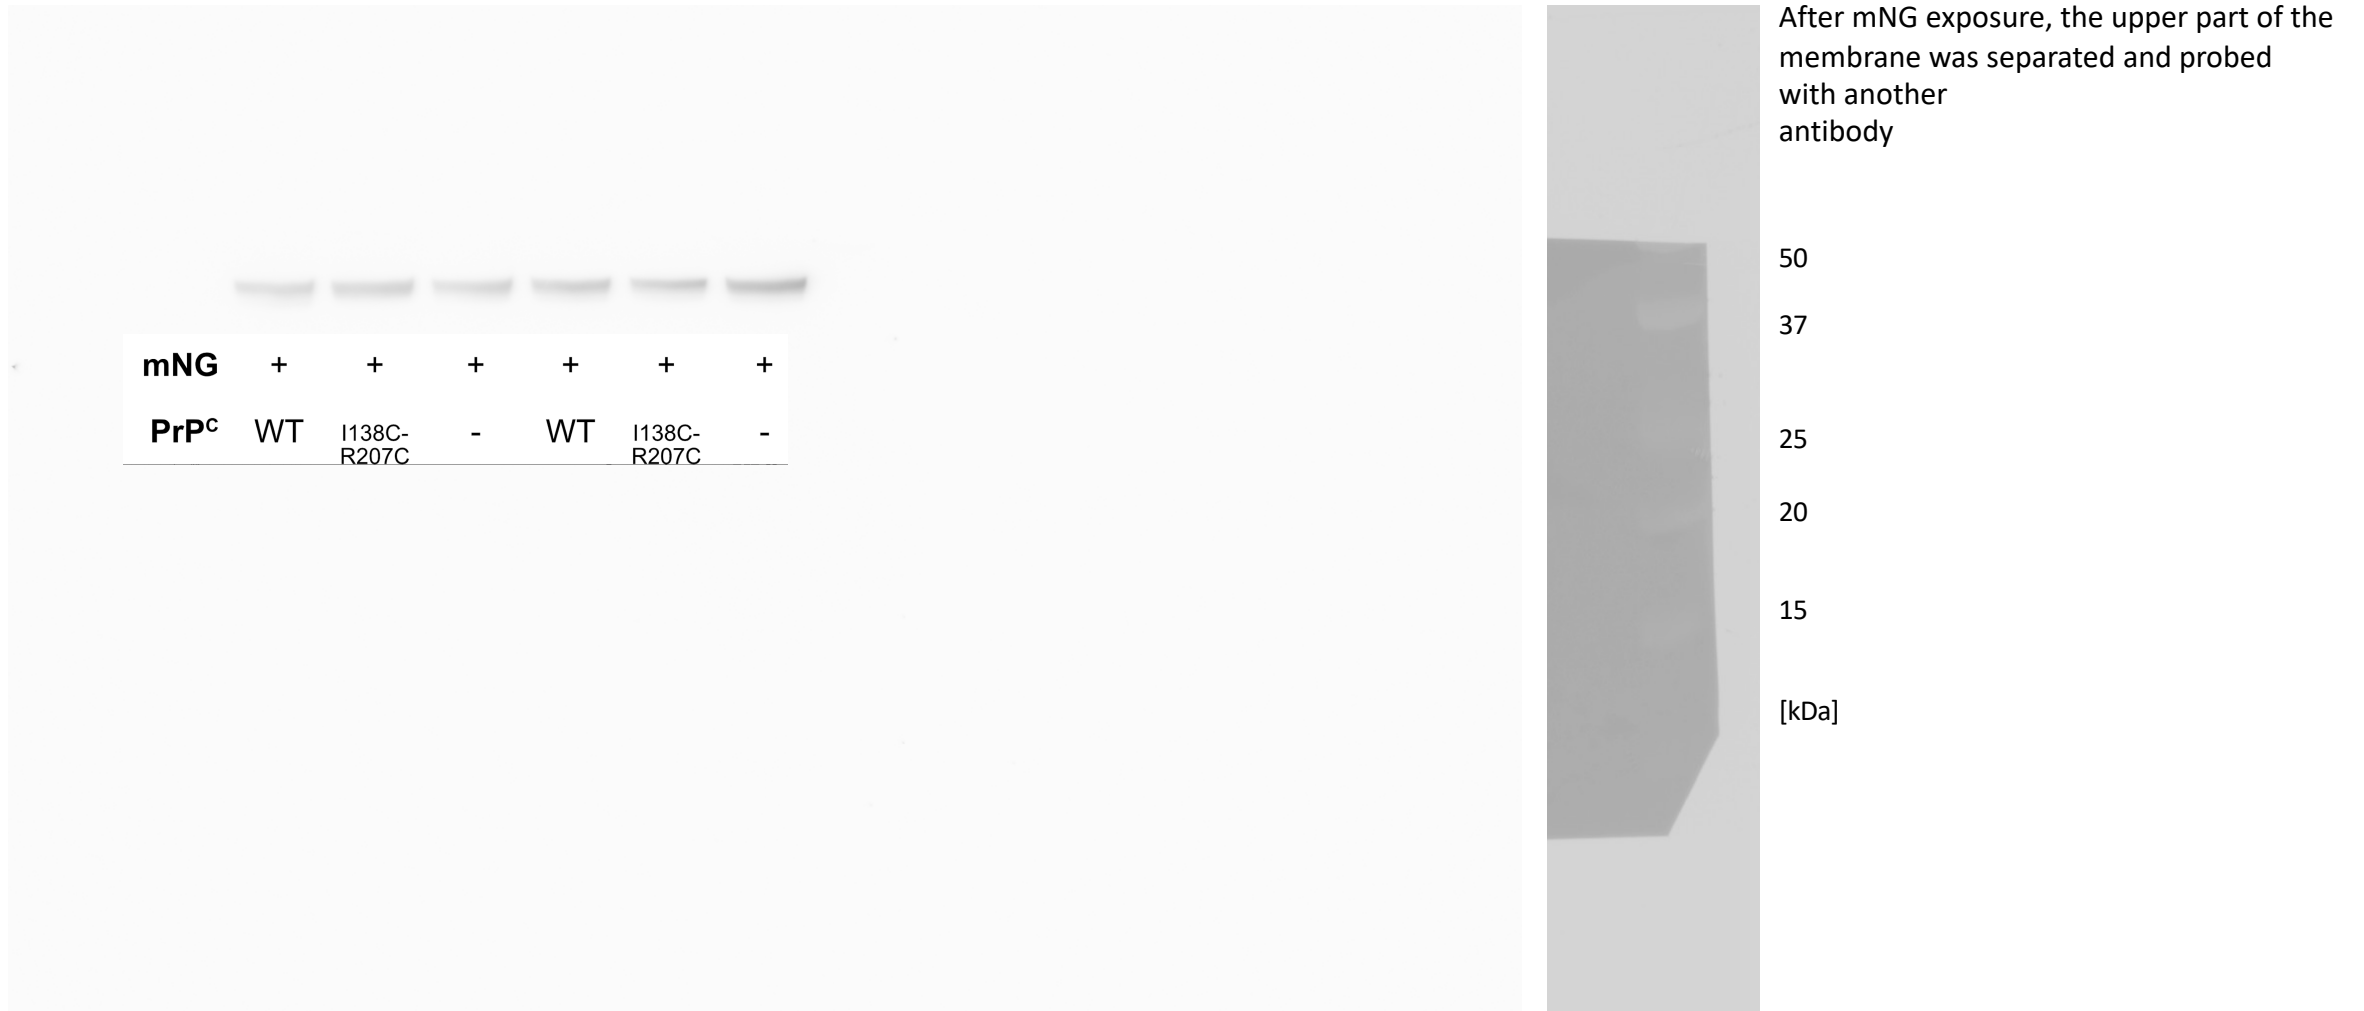

Supplement: 41594_2022_814_MOESM17_ESM.pdf [file 41594_2022_814_MOESM17_ESM.pdf]
