# Supplementary material for: A conformational switch controlling the toxicity of the prion protein
Source: PubMed Central journal article supplement (PMC9371974; doi:10.1038/s41594-022-00814-7), 2022-08-10
Supplement: 41594_2022_814_MOESM1_ESM.pdf [file 41594_2022_814_MOESM1_ESM.pdf]

---

**Supplementary information**

---

**A conformational switch controlling the toxicity of the prion protein**

---

In the format provided by the authors and unedited

# Supplementary Figure 1

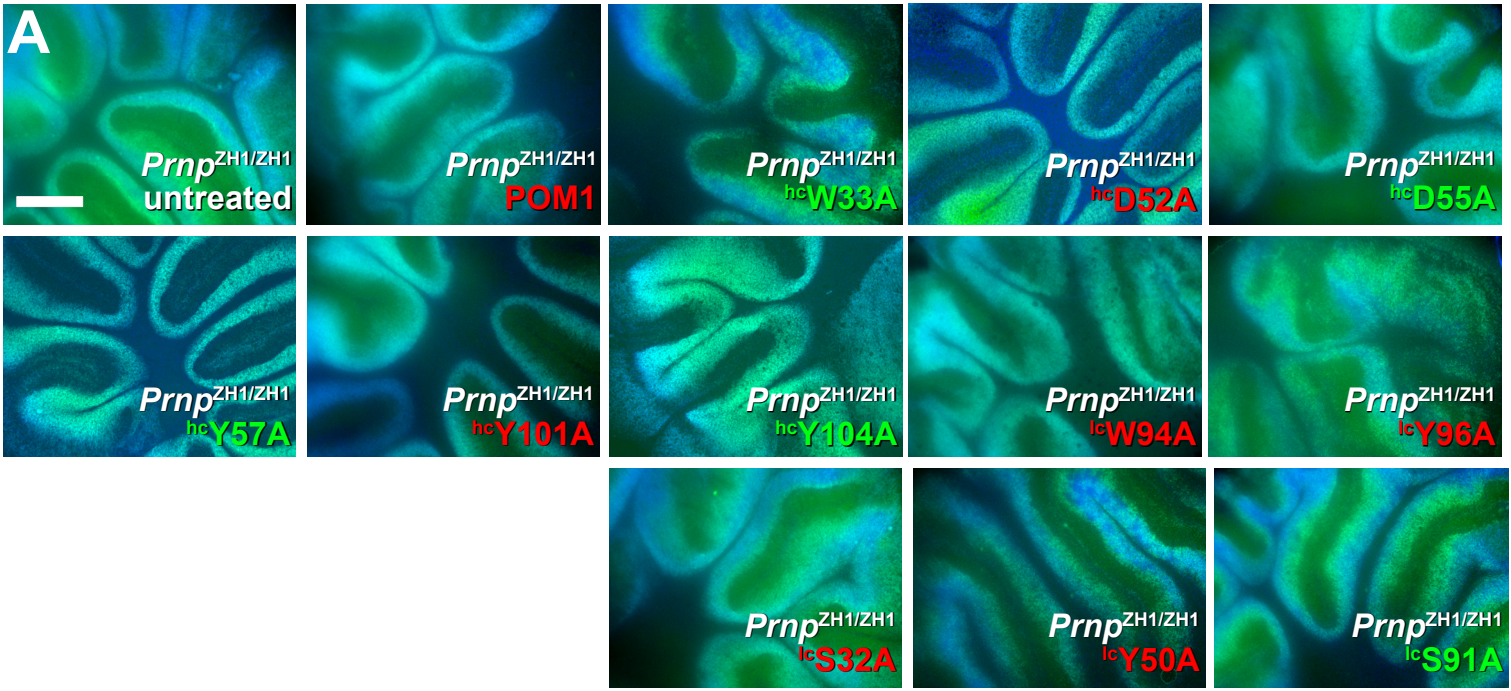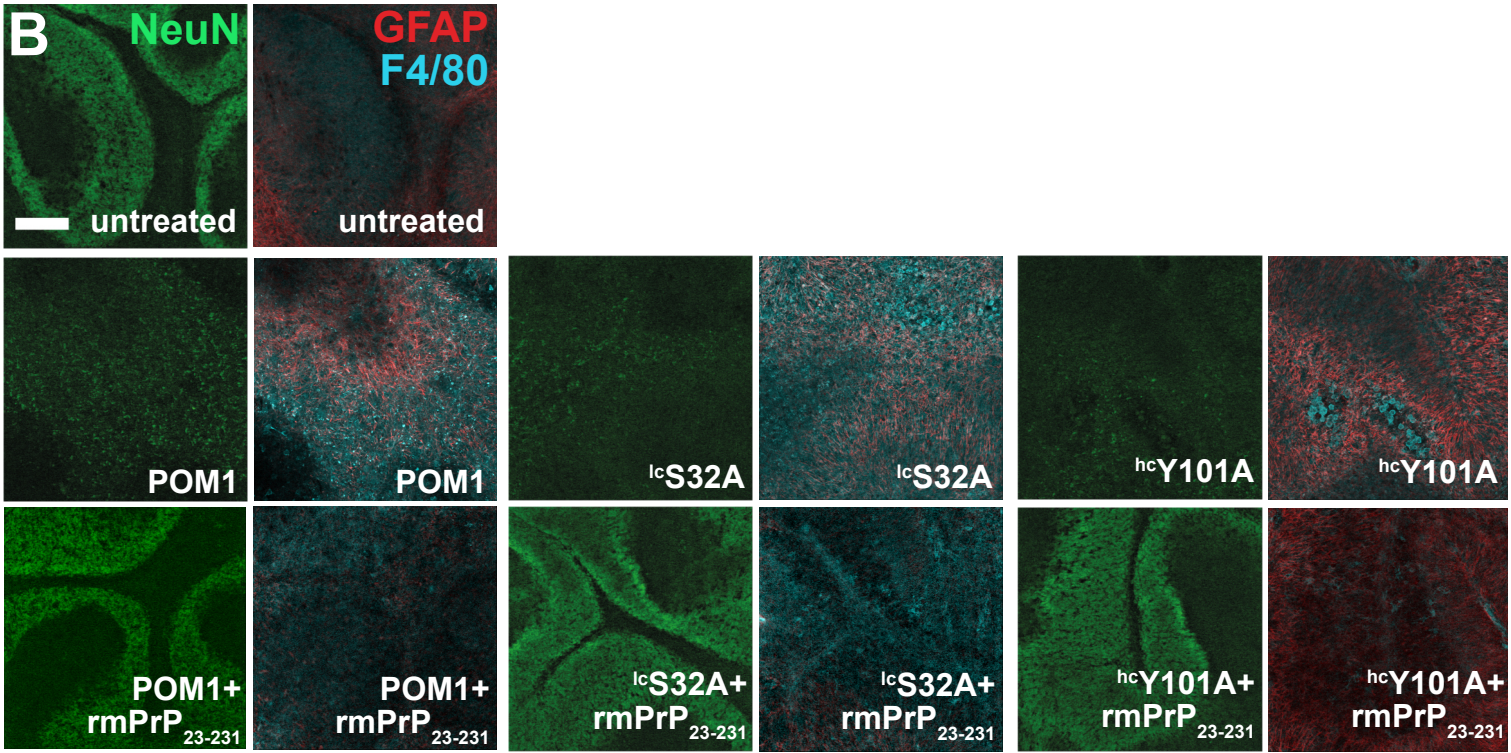

# Supplementary Figure 2

## A

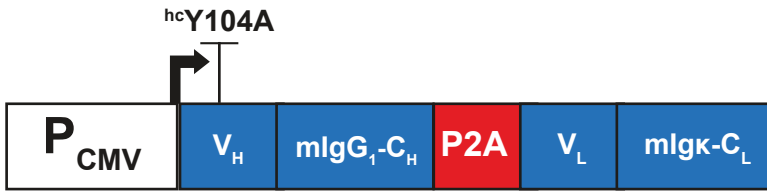

## B

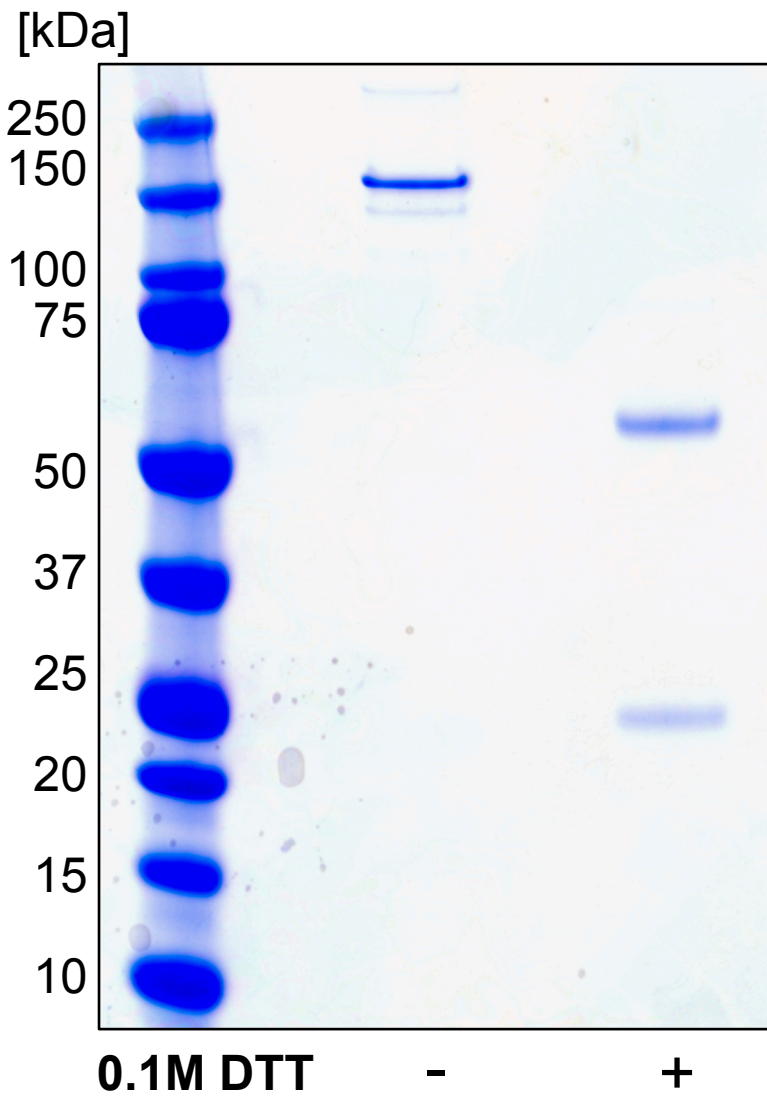

## C

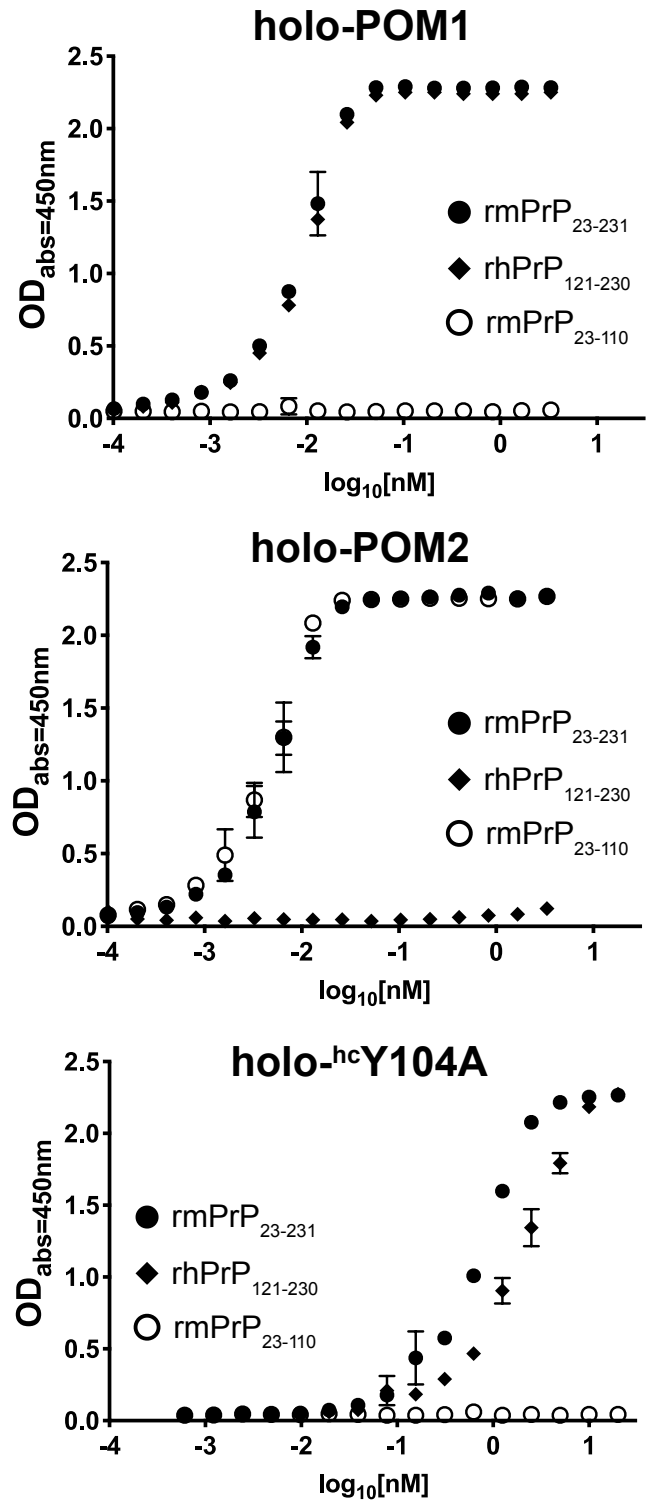

**Supplementary Figure 1. (A)** Representative fluorescent micrographs of *Prnp*<sup>ZH1/ZH1</sup> COCS treated with pomologs and morphometric quantification. In all cases, neuronal viability is similar to that of controls, indicating that neither POM1 nor any of the pomologs exert a toxic effect onto PrP-deficient tissue. Innocuous / protective pomologs are colored green, toxic pomologs red. Scale bar = 500  $\mu$ m. Quantification of all biological replicates is given in Extended Data Figure 8a. **(B)** Immunofluorescent stainings of COCS with NeuN (neurons), GFAP (astrocytes) and F-4/80 (microglia and macrophages). The high-affinity toxic pomologs <sup>lc</sup>S32A and <sup>hc</sup>Y101A were administered to *tga20* COCS, either alone or after preincubation with equimolar amounts of soluble rmPrP<sub>23-231</sub>. POM1, <sup>lc</sup>S32A and <sup>lc</sup>Y101A induced profound neuronal loss, astrogliosis and activation of microglia, which was completely prevented by pre-incubation with their cognate antigen. Scale bar = 200  $\mu$ m. Quantification of all biological replicates is given in Extended Data Figure 8c.

**Supplementary Figure 2. (A)** Schematic depiction of the vector for recombinant mammalian expression of holo-<sup>hc</sup>Y104A. A bicistronic expression cassette encoding the variable domains of <sup>hc</sup>Y104A were grafted onto a murine IgG1 and Igk backbone driven by a cytomegalovirus promoter. A P2A self-cleaving site at the 3' end of the heavy-chain fragment results in co-translational cleavage of the polyprotein. **(B)** SDS-PAGE of purified holo-<sup>hc</sup>Y104A in the presence and absence of 0.1M Dithiothreitol (DTT). **(C)** Indirect ELISA of holo-<sup>hc</sup>Y104A and holo-POM1 showing (sub-) nanomolar affinity to full-length, recombinant mouse PrP (mPrP<sub>23-230</sub>) and a globular domain fragment of recombinant human PrP (mPrP<sub>121-231</sub>). As a control, holo-wtPOM2, which targets the flexible tail, bound to both rmPrP<sub>23-231</sub> and rmPrP<sub>23-110</sub>, but not to rhPrP<sub>121-230</sub>. Neither holo-<sup>hc</sup>Y104A nor holo-POM1 bind to rmPrP<sub>23-110</sub>. Nanomolar antibody concentrations are plotted in log<sub>10</sub> scales on the abscissa. Data points are given as means, bars indicate standard deviation.

Table 1A

| Res N* | chain | $\Delta G(\text{complex})$ |                                                              |
|--------|-------|----------------------------|--------------------------------------------------------------|
| 32     | L     | 0.44                       | P<br>O<br>M<br>1<br><br>r<br>e<br>s<br>i<br>d<br>u<br>e<br>s |
| 50     | L     | 1.96                       |                                                              |
| 91     | L     | 2.09                       |                                                              |
| 92     | L     | 0.27                       |                                                              |
| 93     | L     | 0.28                       |                                                              |
| 94     | L     | 1.39                       |                                                              |
| 96     | L     | 0.35                       |                                                              |
| 33     | H     | 2.88                       |                                                              |
| 52     | H     | 2.47                       |                                                              |
| 54     | H     | -0.02                      |                                                              |
| 55     | H     | 1.37                       |                                                              |
| 57     | H     | 1.76                       |                                                              |
| 59     | H     | -0.01                      |                                                              |
| 101    | H     | 0.59                       |                                                              |
| 103    | H     | -0.03                      |                                                              |
| 104    | H     | 4.91                       |                                                              |
|        |       |                            |                                                              |
| 139    | A     | -0.01                      | P<br>r<br>P<br><br>r<br>e<br>s<br>i<br>d<br>u<br>e<br>s      |
| 146    | A     | -0.01                      |                                                              |
| 138    | A     | 0.11                       |                                                              |
| 143    | A     | -0.21                      |                                                              |
| 145    | A     | 0.31                       |                                                              |
| 141    | A     | 0.39                       |                                                              |
| 212    | A     | 0.78                       |                                                              |
| 140    | A     | 0.93                       |                                                              |
| 147    | A     | 1.9                        |                                                              |
| 144    | A     | 3.44                       |                                                              |
| 208    | A     | 3.86                       |                                                              |

Table 1B

|         | $k_a(1/\text{Ms})$ | $k_d(1/\text{s})$    | $K_D(\text{nM})$ |             |
|---------|--------------------|----------------------|------------------|-------------|
| POM1    | $6.4 \times 10^4$  | $3.1 \times 10^{-4}$ | 4.8              |             |
| hcW33A  | no binding         | no binding           | no binding       | CDR_H1 loop |
| hcD52A  | $3.3 \times 10^5$  | $4.6 \times 10^{-2}$ | 103              | CDR_H2 loop |
| hcD55A  | $1 \times 10^5$    | $3.7 \times 10^{-2}$ | 372              |             |
| hcY57A  | $7.7 \times 10^4$  | $3.1 \times 10^{-2}$ | 406              | CDR_H3 loop |
| hcY101A | $6.3 \times 10^4$  | $7.1 \times 10^{-4}$ | 11               |             |
| hcY104A | $3.6 \times 10^4$  | $2.1 \times 10^{-4}$ | 8.8              |             |
| lcS32A  | $6.4 \times 10^4$  | $5.9 \times 10^{-4}$ | 10               | CDR_L1 loop |
| lcY50A  | $5.7 \times 10^4$  | $8.2 \times 10^{-3}$ | 313              | CDR_L2 loop |
| lcS91A  | $1.3 \times 10^4$  | $1.8 \times 10^{-2}$ | 1430             | CDR_L3 loop |
| lcW94A  | $3.1 \times 10^5$  | $2.7 \times 10^{-2}$ | 201              |             |
| lcY96A  | $6.2 \times 10^4$  | $7.4 \times 10^{-3}$ | 123              |             |



## Numerical Source Data Suppl. Fig. 2C

### holo-Y104A

| $\log_{10}[\text{nM}]$ | $\text{mPrP}_{23-230}$ | $\text{mPrP}_{121-230}$ | $\text{mPrP}_{23-110}$ |
|------------------------|------------------------|-------------------------|------------------------|
| 1.301029996            | 2.268                  | 2.265                   | 2.277                  |
| 1                      | 2.254                  | 2.253                   | 2.164                  |
| 0.698970004            | 2.218                  | 2.214                   | 1.743                  |
| 0.397940009            | 2.087                  | 2.068                   | 1.251                  |
| 0.096910013            | 1.598                  | 1.599                   | 0.842                  |
| -0.204119983           | 1.004                  | 1.015                   | 0.445                  |
| -0.505149978           | 0.585                  | 0.566                   | 0.254                  |
| -0.806179974           | 0.567                  | 0.306                   | 0.176                  |
| -1.10720997            | 0.184                  | 0.172                   | 0.281                  |
| -1.408239965           | 0.116                  | 0.101                   | 0.073                  |
| -1.709269961           | 0.076                  | 0.072                   | 0.059                  |
| -2.010299957           | 0.057                  | 0.051                   | 0.047                  |
| -2.311329952           | 0.052                  | 0.041                   | 0.047                  |
| -2.612359948           | 0.048                  | 0.042                   | 0.044                  |
| -2.913389944           | 0.042                  | 0.041                   | 0.042                  |
| -3.214419939           | 0.043                  | 0.041                   | 0.043                  |

### holo-POM2

| $\log_{10}[\text{nM}]$ | $\text{mPrP}_{23-230}$ | $\text{mPrP}_{121-230}$ | $\text{mPrP}_{23-110}$ |
|------------------------|------------------------|-------------------------|------------------------|
| 0.522878745            | 2.273                  | 2.27                    | 0.125                  |
| 0.22184875             | 2.26                   | 2.252                   | 0.078                  |
| -0.079181246           | 2.309                  | 2.273                   | 0.071                  |
| -0.380211242           | 2.276                  | 2.277                   | 0.054                  |
| -0.681241237           | 2.27                   | 2.258                   | 0.047                  |
| -0.982271233           | 2.256                  | 2.253                   | 0.042                  |
| -1.283301229           | 2.24                   | 2.242                   | 0.038                  |
| -1.584331224           | 2.2                    | 2.192                   | 0.045                  |
| -1.88536122            | 1.864                  | 1.972                   | 0.052                  |
| -2.186391216           | 1.213                  | 1.375                   | 0.054                  |
| -2.487421211           | 0.662                  | 0.913                   | 0.067                  |
| -2.788451207           | 0.345                  | 0.364                   | 0.038                  |
| -3.089481203           | 0.214                  | 0.229                   | 0.077                  |
| -3.390511198           | 0.126                  | 0.138                   | 0.042                  |
| -3.691541194           | 0.106                  | 0.084                   | 0.052                  |
| -3.99257119            | 0.064                  | 0.069                   | 0.095                  |

### holo-POM1

| $\log_{10}[\text{nM}]$ | $\text{mPrP}_{23-230}$ | $\text{mPrP}_{121-230}$ | $\text{mPrP}_{23-110}$ |
|------------------------|------------------------|-------------------------|------------------------|
| 0.522878745            | 2.305                  | 2.261                   | 2.251                  |
| 0.22184875             | 2.314                  | 2.26                    | 2.24                   |
| -0.079181246           | 2.313                  | 2.252                   | 2.24                   |
| -0.380211242           | 2.31                   | 2.252                   | 2.24                   |
| -0.681241237           | 2.311                  | 2.251                   | 2.251                  |
| -0.982271233           | 2.323                  | 2.258                   | 2.251                  |
| -1.283301229           | 2.319                  | 2.247                   | 2.231                  |
| -1.584331224           | 2.132                  | 2.065                   | 2.043                  |
| -1.88536122            | 1.638                  | 1.328                   | 1.373                  |
| -2.186391216           | 0.89                   | 0.863                   | 0.781                  |
| -2.487421211           | 0.507                  | 0.497                   | 0.451                  |
| -2.788451207           | 0.27                   | 0.253                   | 0.247                  |
| -3.089481203           | 0.181                  | 0.177                   | 0.182                  |
| -3.390511198           | 0.138                  | 0.117                   | 0.109                  |
| -3.691541194           | 0.122                  | 0.077                   | 0.082                  |
| -3.99257119            | 0.074                  | 0.063                   | 0.061                  |
