# Supplementary material for: A conformational switch controlling the toxicity of the prion protein
Source: PubMed Central journal article supplement (PMC9371974; doi:10.1038/s41594-022-00814-7), 2022-08-10

# Fig2D

Page 1 – raw gel

Page 2 – annotation, ladder

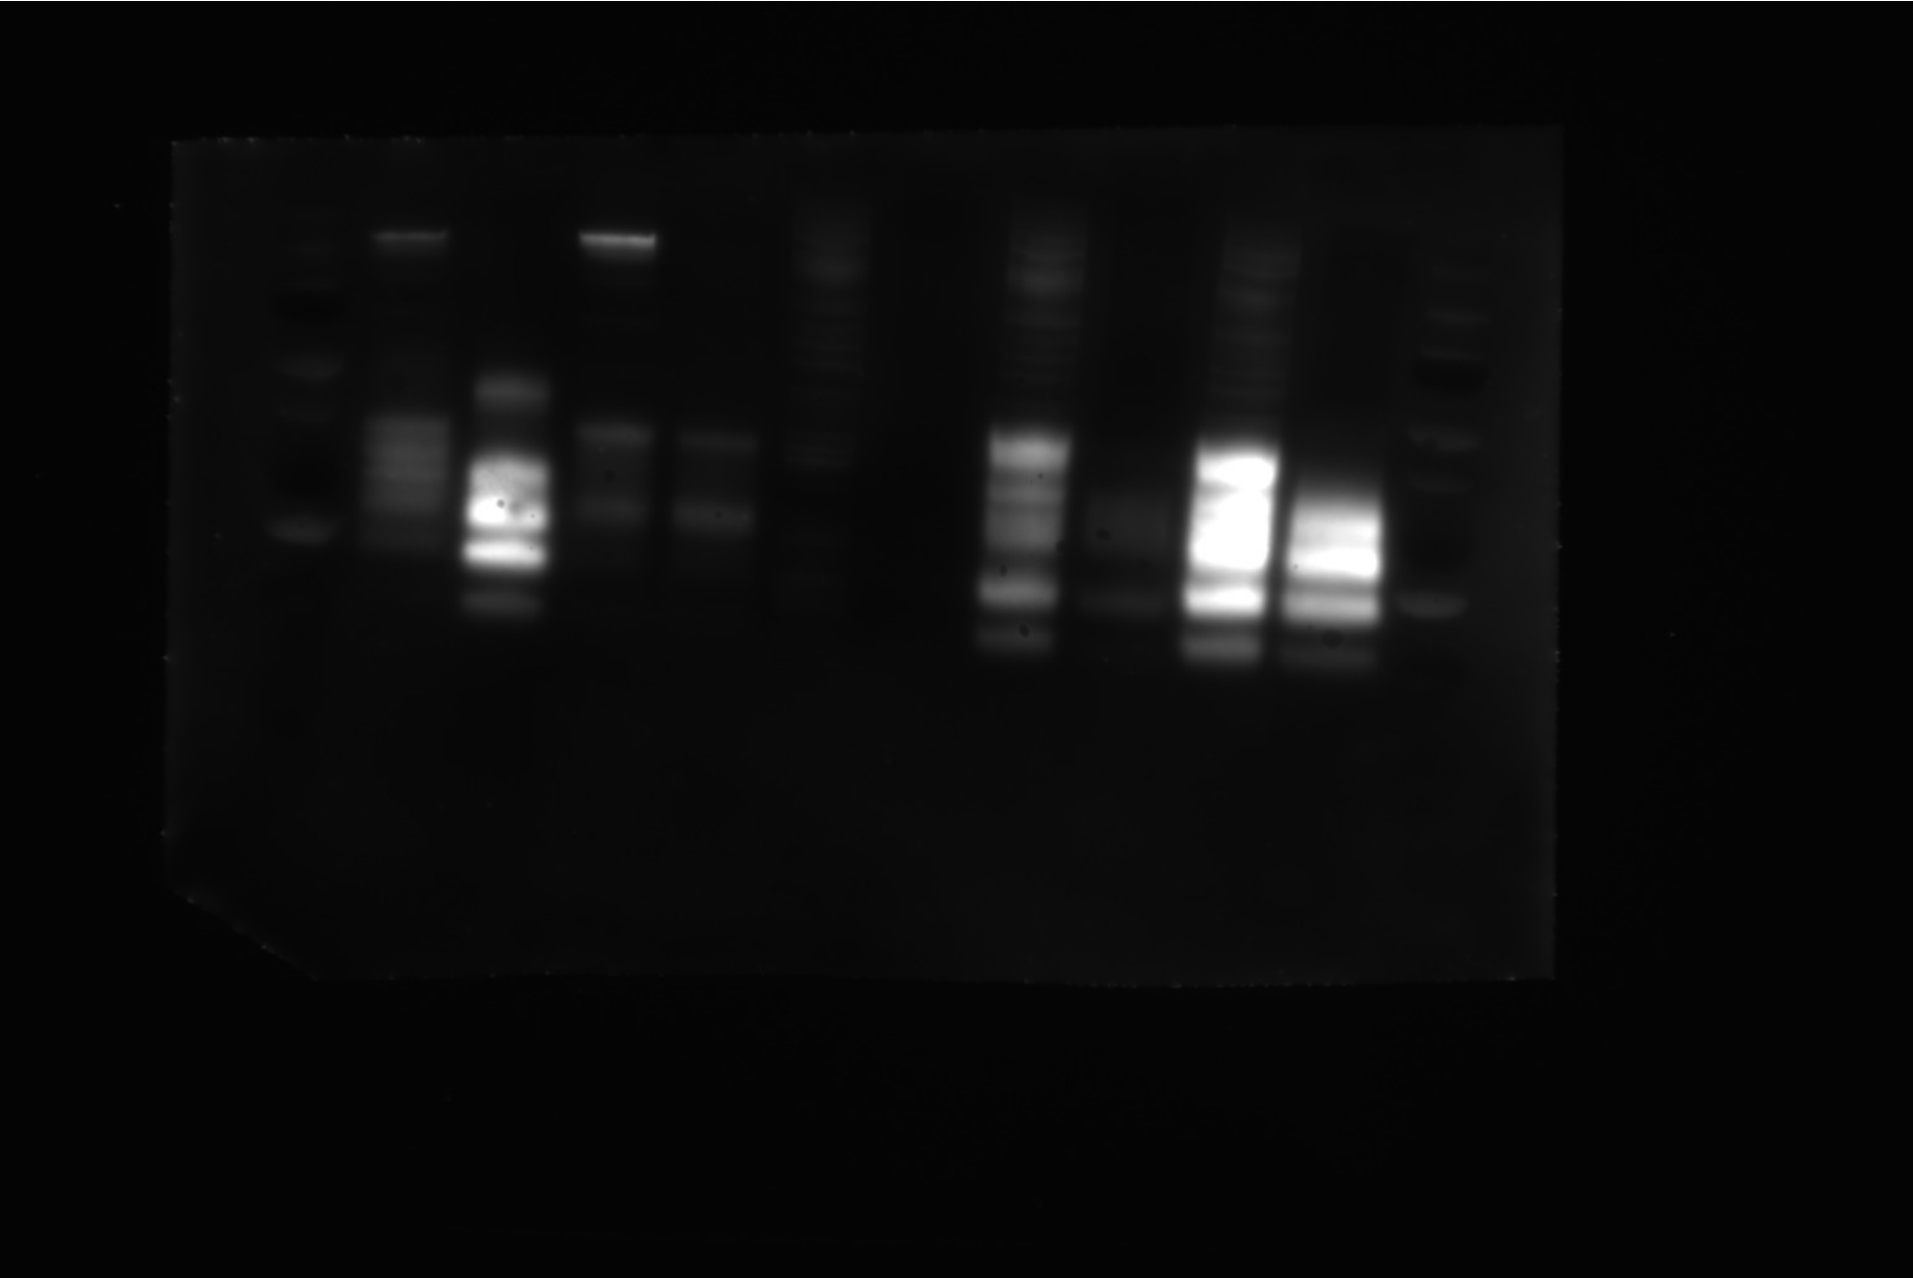

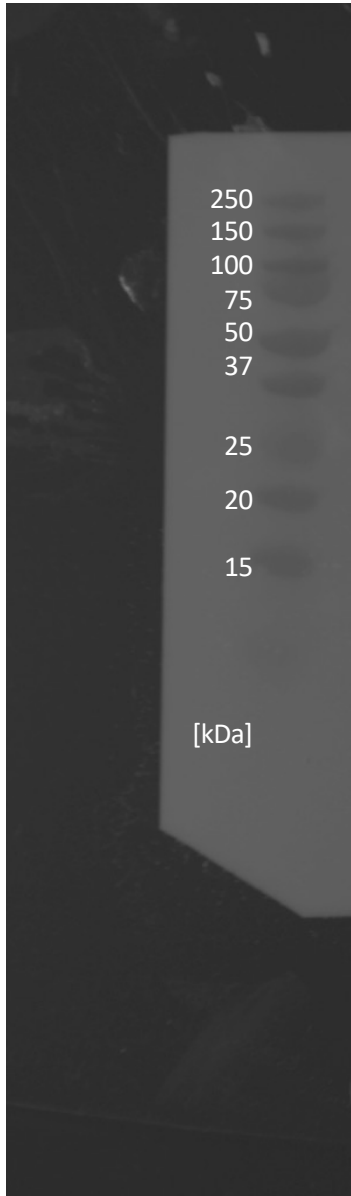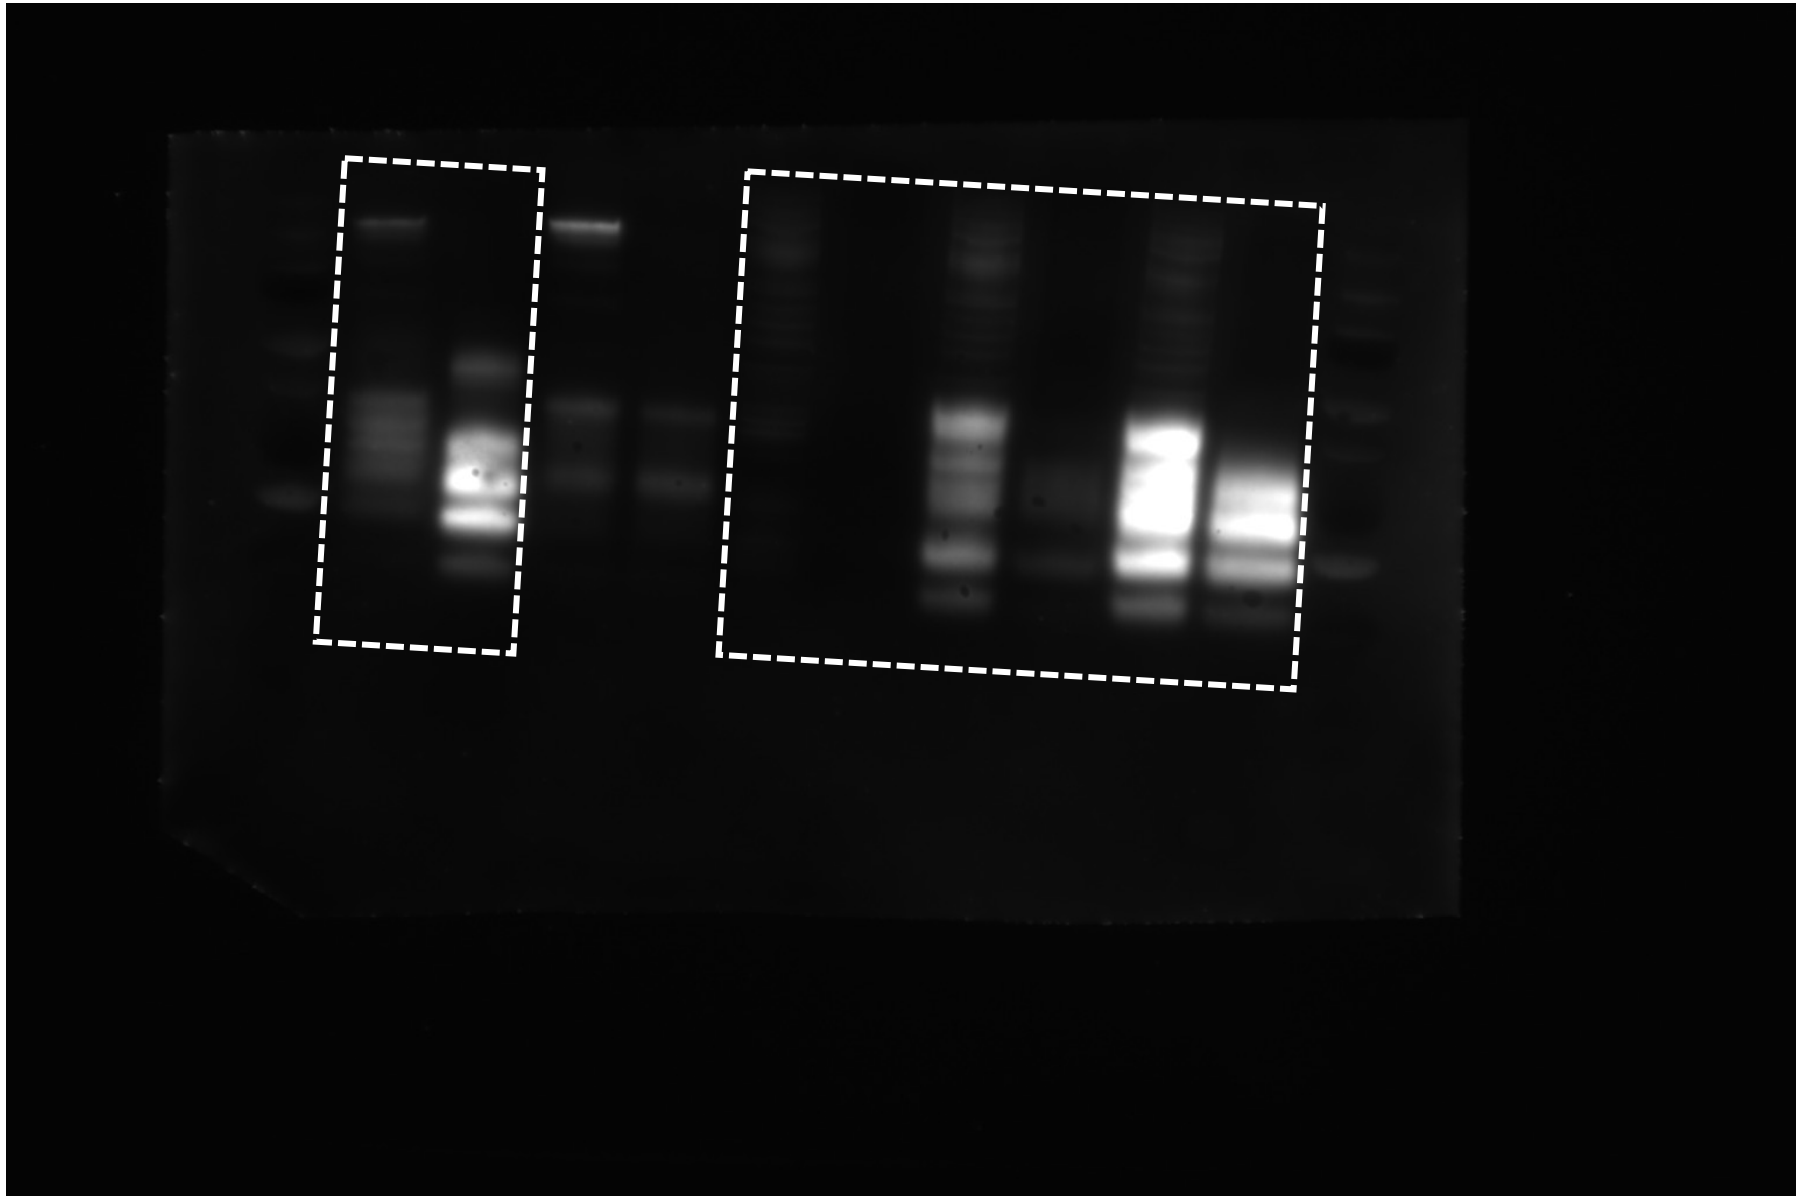

Supplement: 41594_2022_814_MOESM7_ESM.pdf [file 41594_2022_814_MOESM7_ESM.pdf]
