# Supplementary material for: A conformational switch controlling the toxicity of the prion protein
Source: PubMed Central journal article supplement (PMC9371974; doi:10.1038/s41594-022-00814-7), 2022-08-10

# Fig 6H

Page 1 – raw gel, mycTag

Page 2 – raw gel, pan Actin

Page 3 – annotation, ladder, mycTag

Page 4 – annotation, ladder, pan Actin

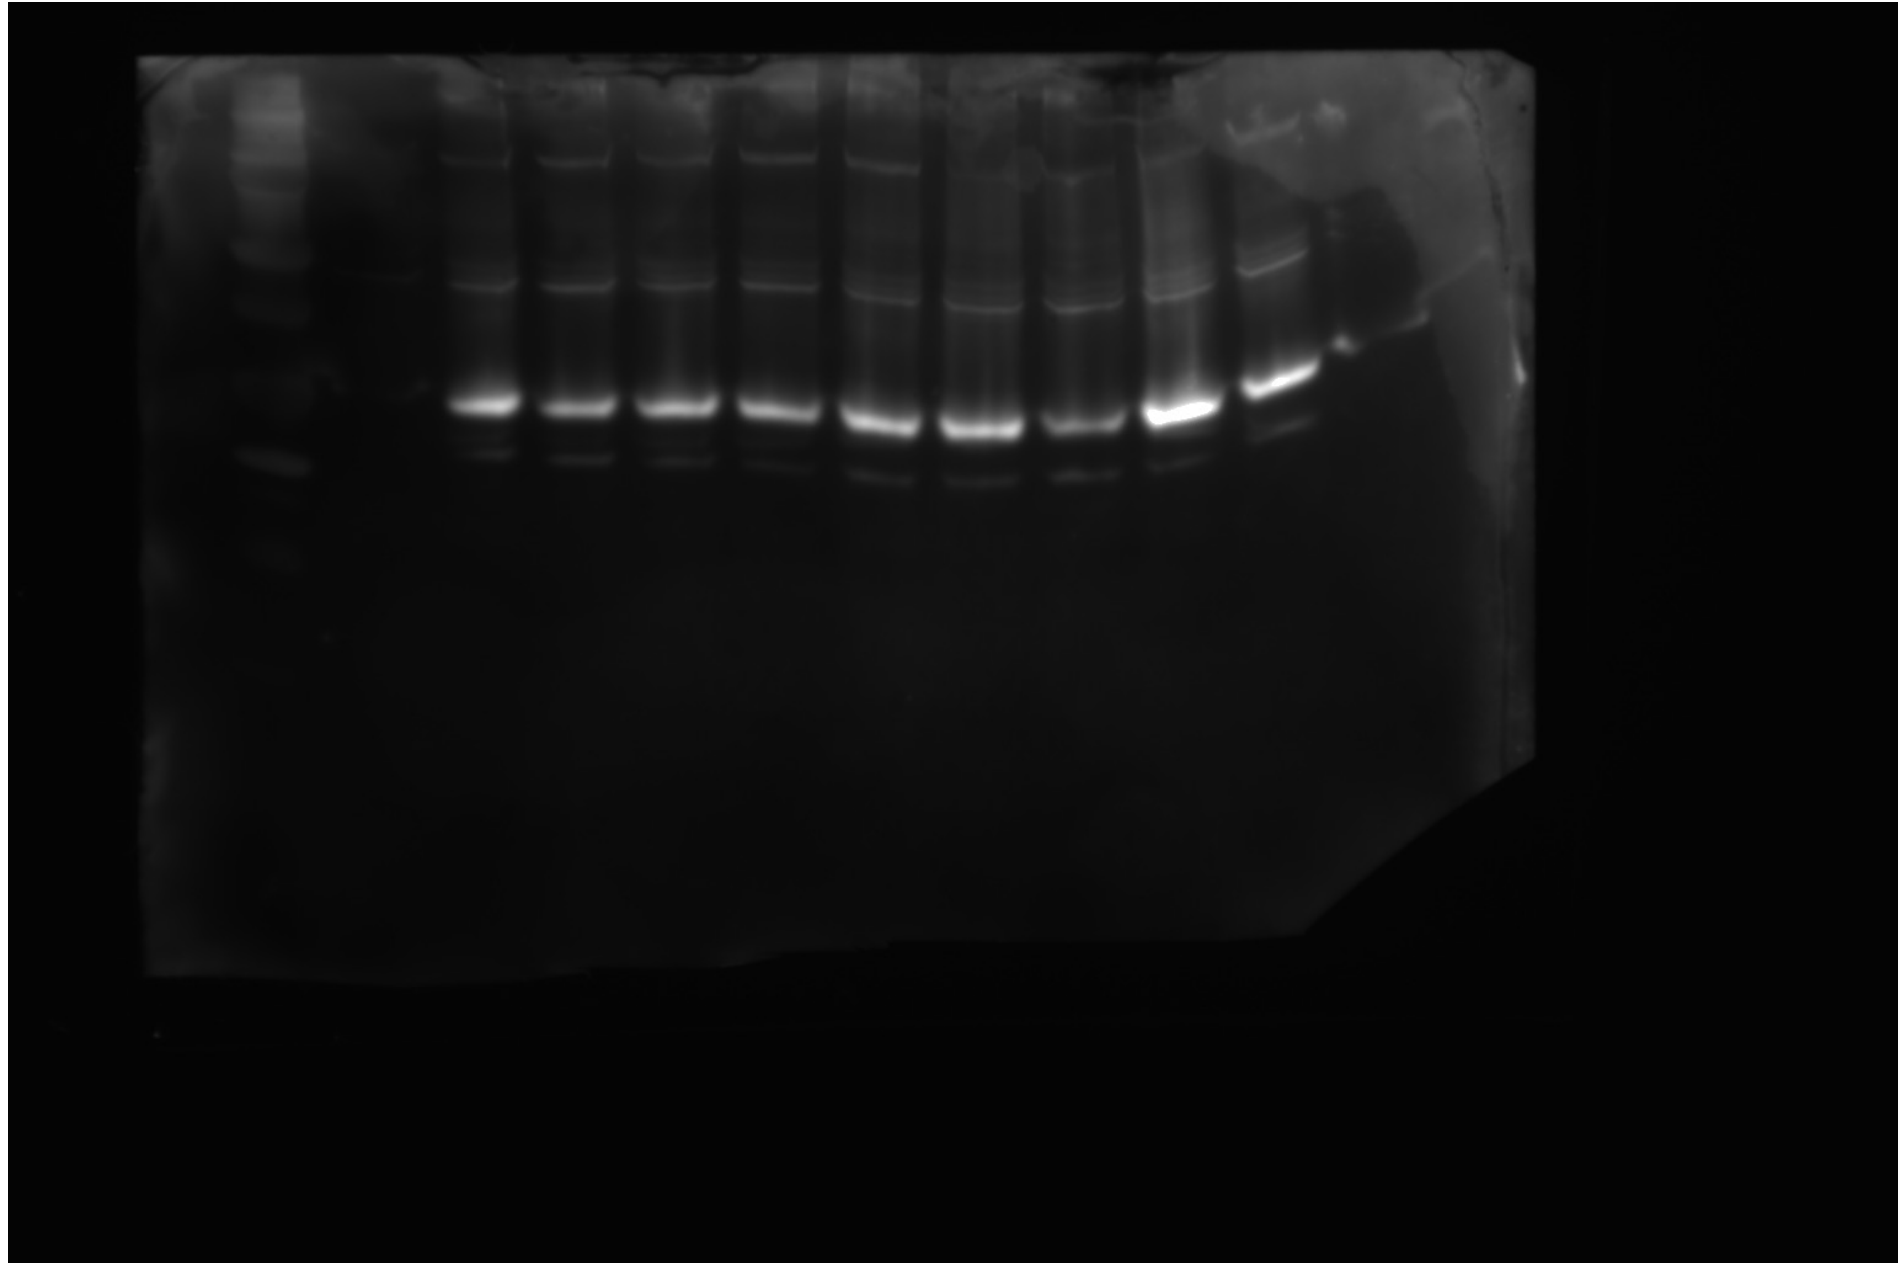

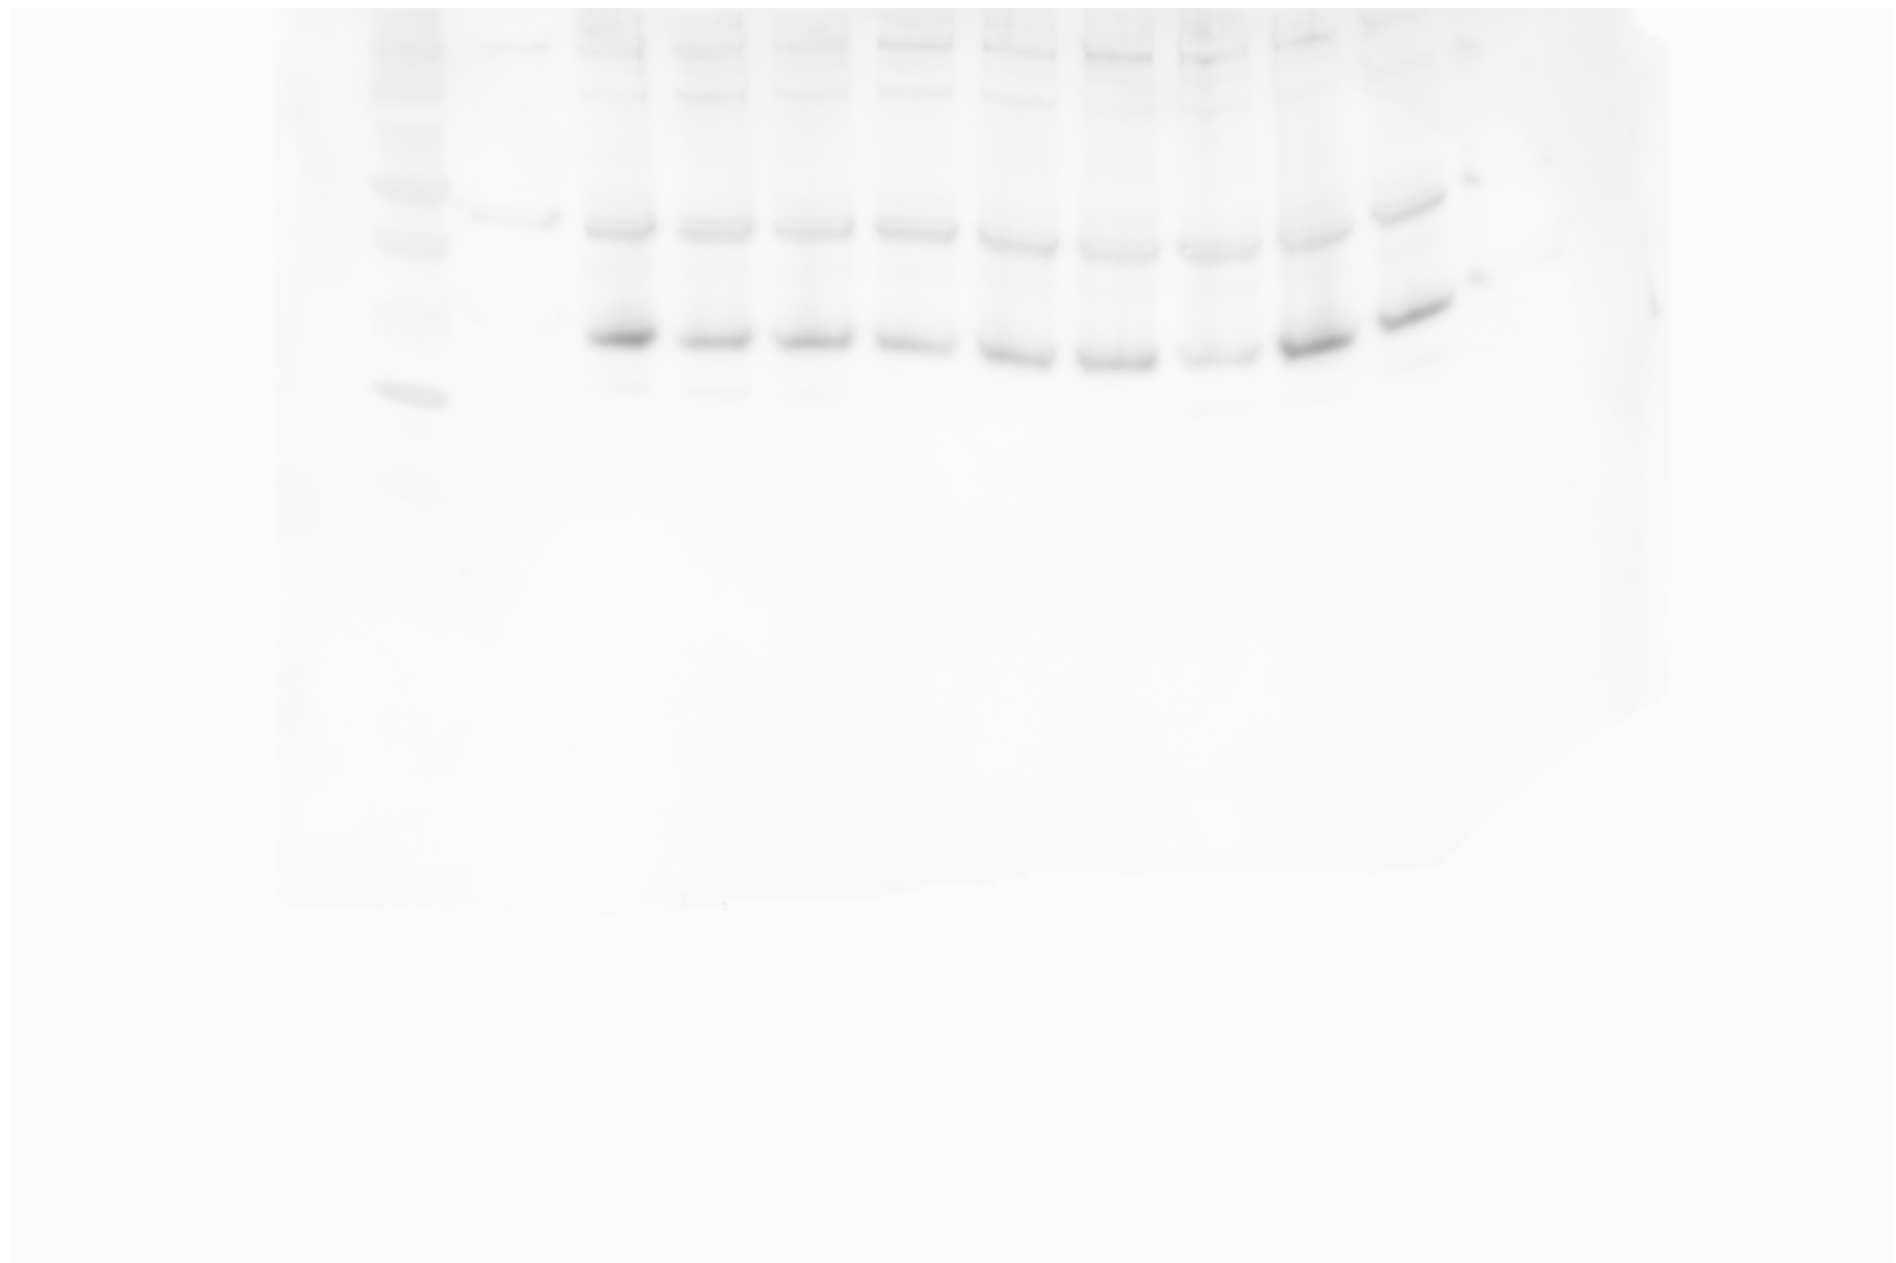

# Fig 6H – myc-tag

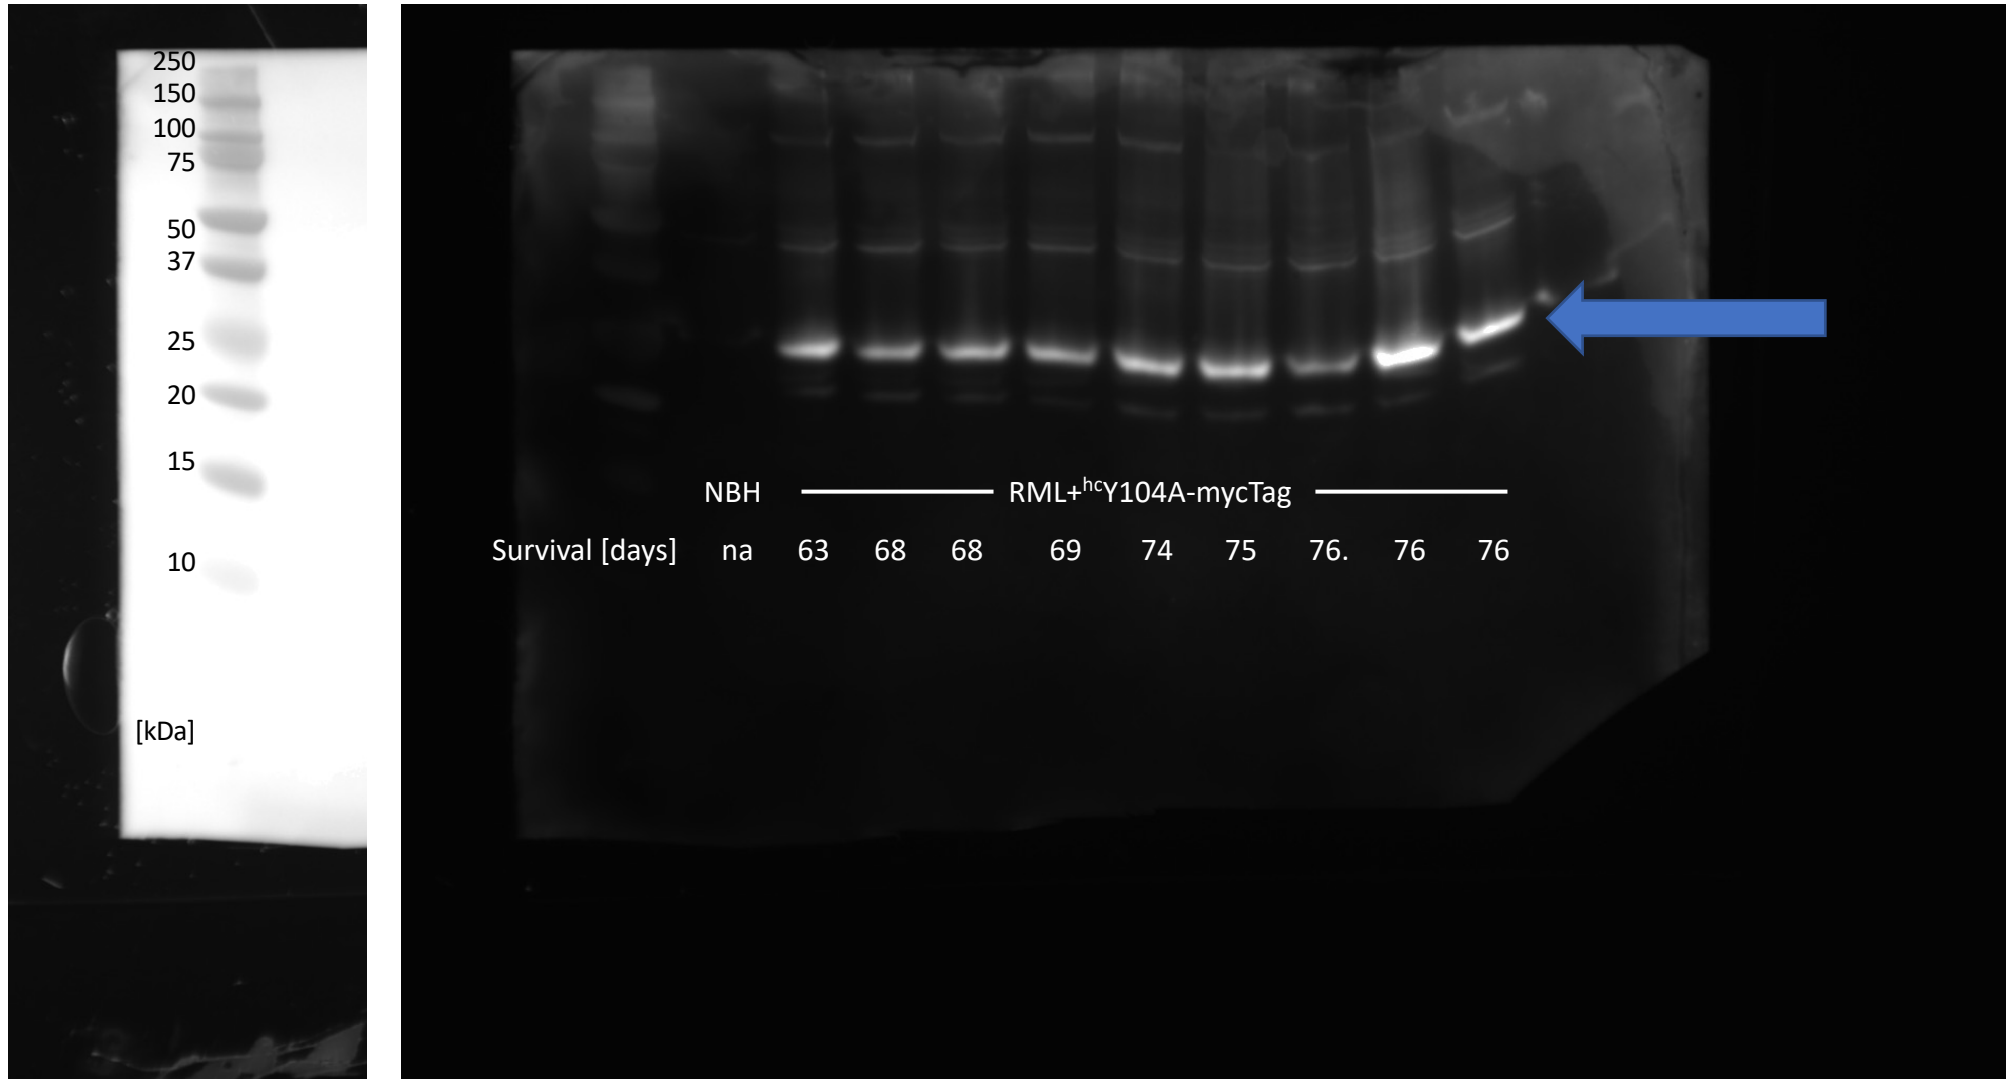

# Fig 6H – Pan actin

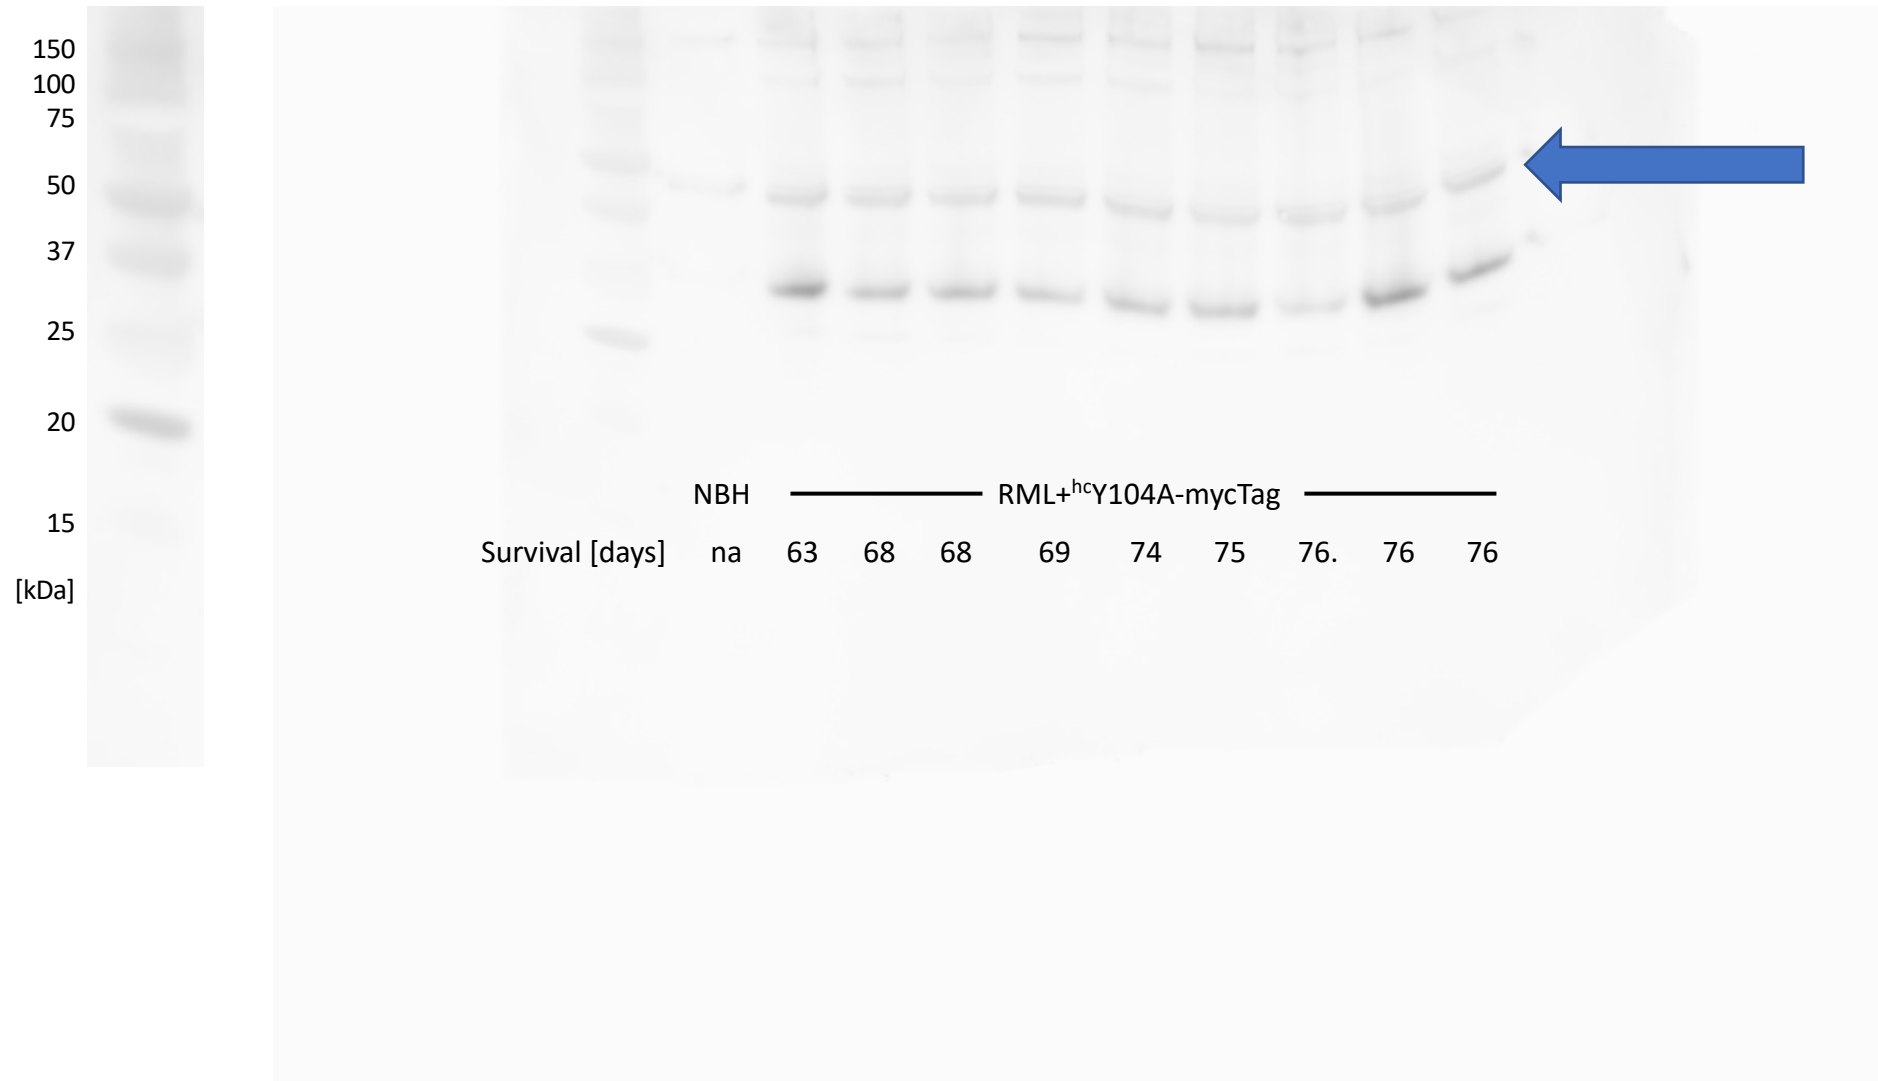

Supplement: 41594_2022_814_MOESM11_ESM.pdf [file 41594_2022_814_MOESM11_ESM.pdf]
