# Supplementary material for: A conformational switch controlling the toxicity of the prion protein
Source: PubMed Central journal article supplement (PMC9371974; doi:10.1038/s41594-022-00814-7), 2022-08-10
Supplement: 41594_2022_814_MOESM15_ESM.pdf [file 41594_2022_814_MOESM15_ESM.pdf]

# Extended Data Fig. 2C

Page 1 – raw gel POM19

Page 2 – raw gel pan actin

Page 3 – annotation, ladder, POM19

Page 4 – annotation, ladder, pan actin

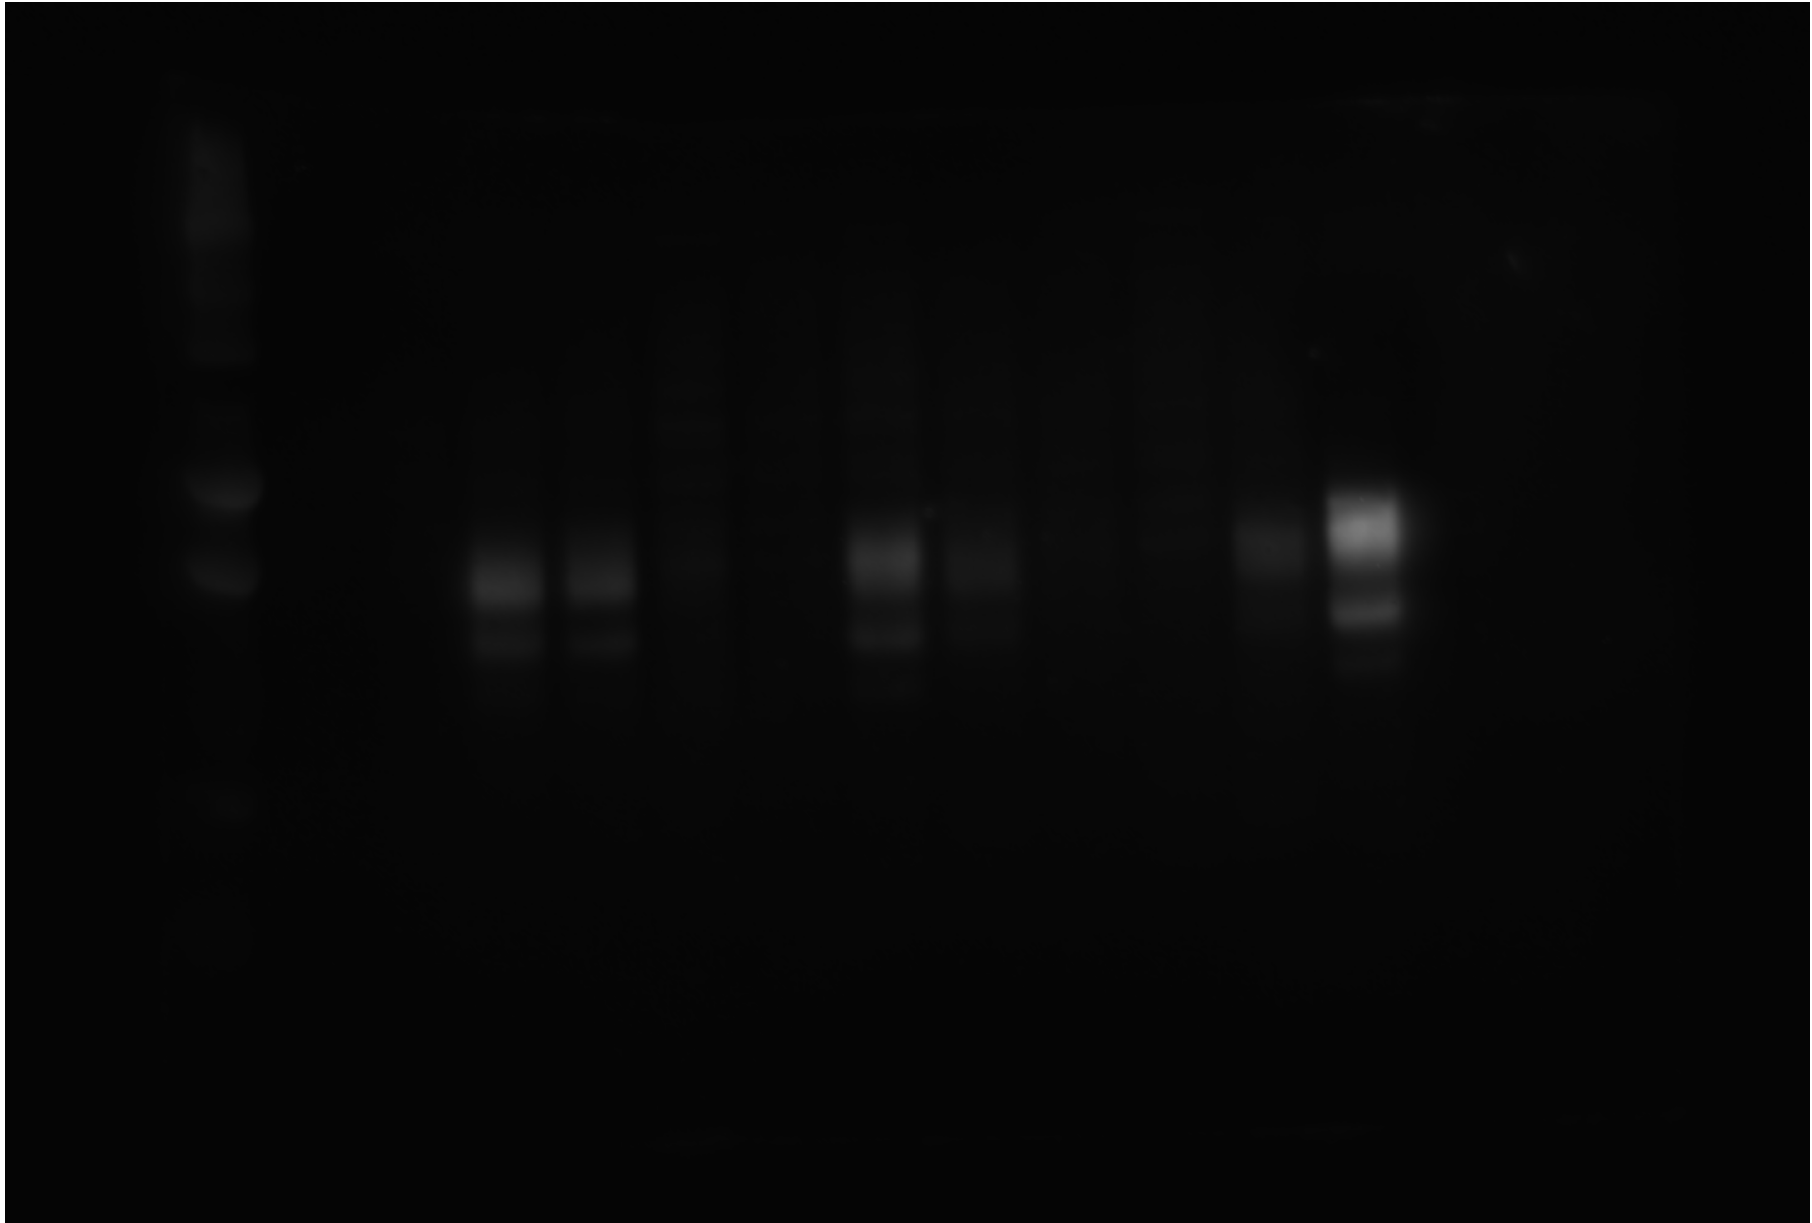

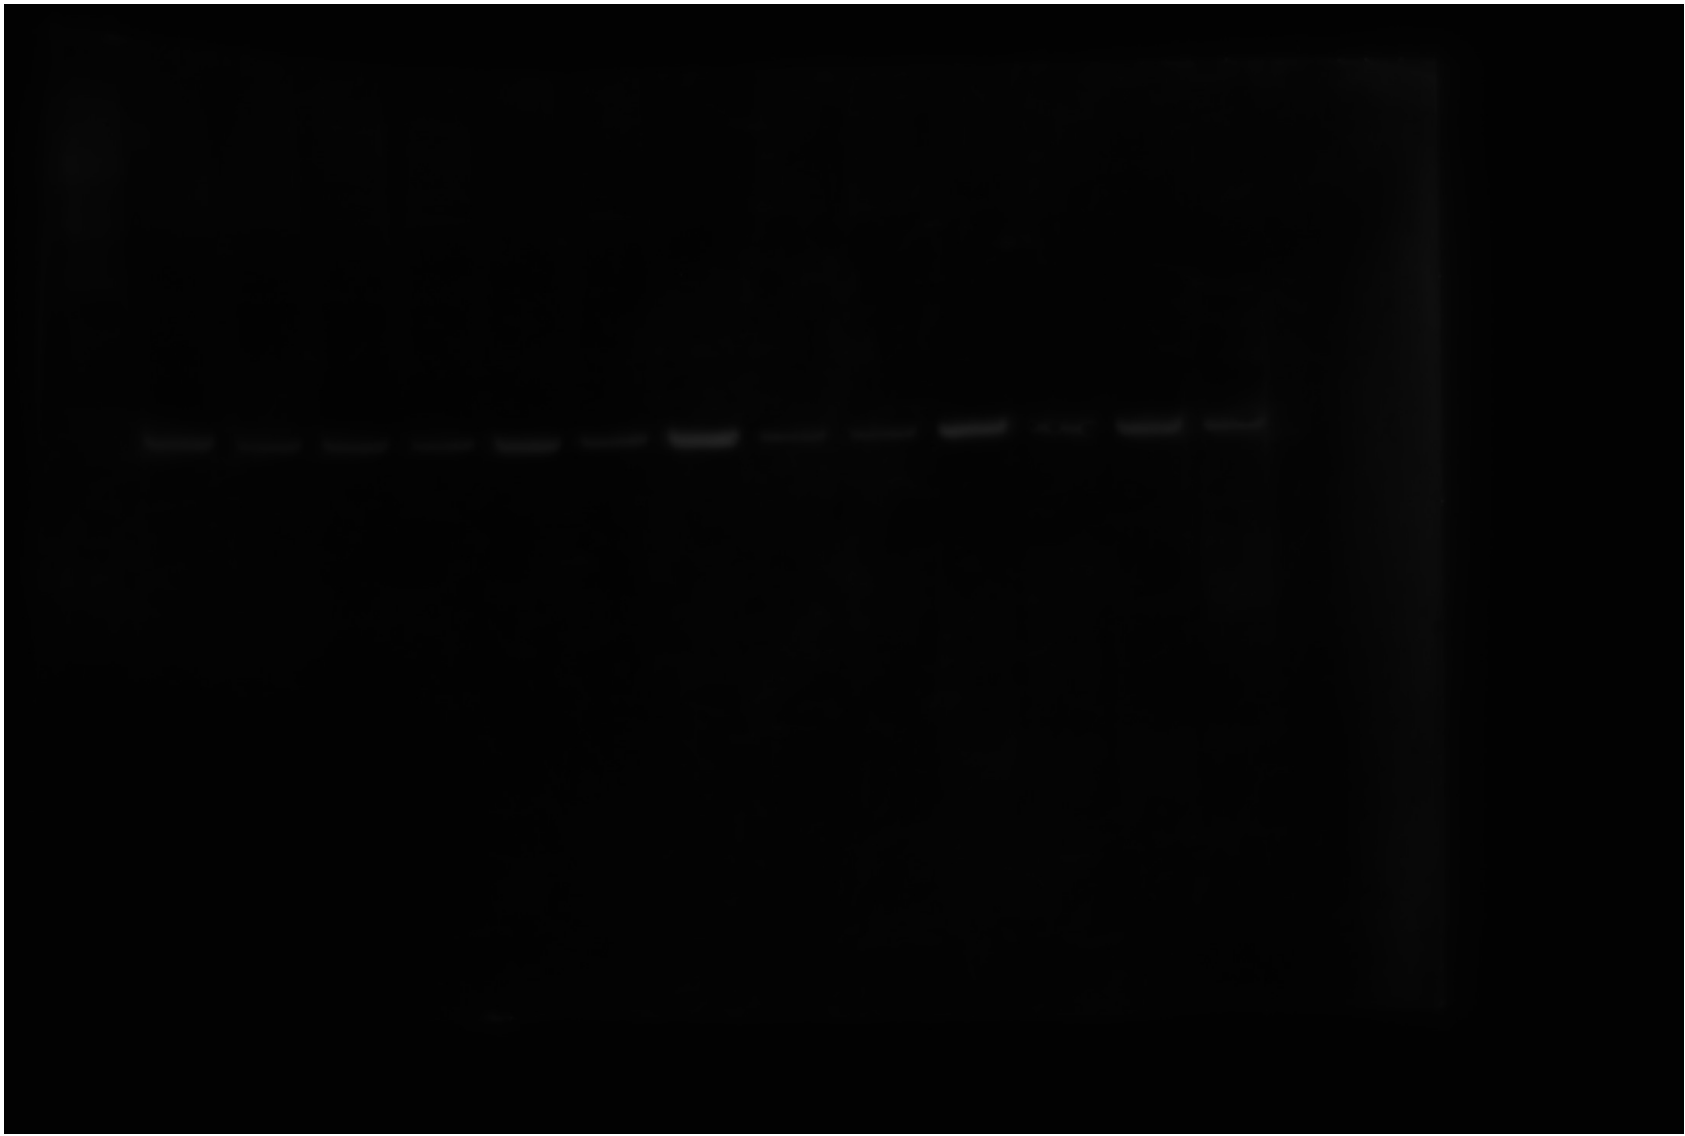

# ED Fig 2C – POM19

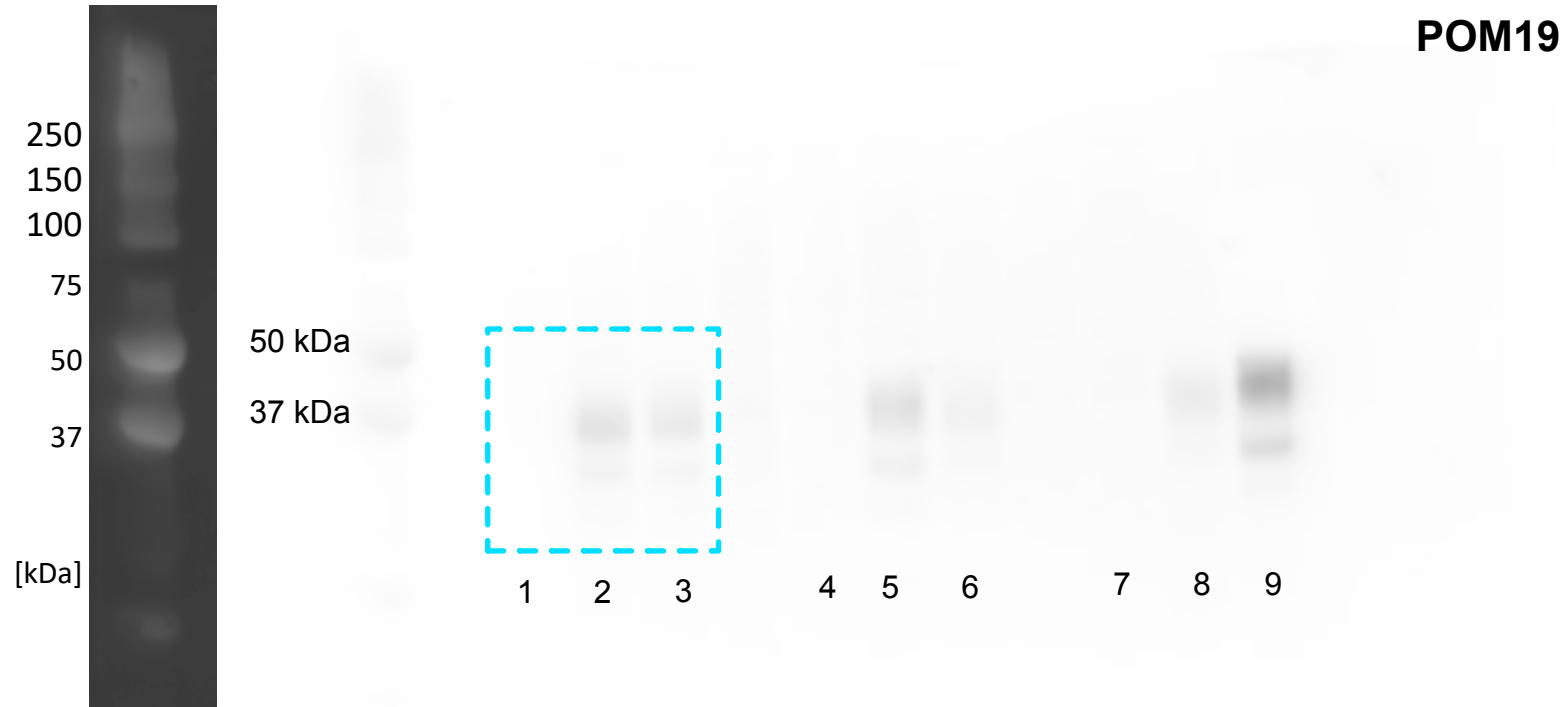

1, 4, 6: CAD5 + empty control plasmid  
2, 5, 7: CAD5 + mPrP<sup>C</sup>  
3, 6, 9: CAD5 + mPrP<sup>R207A</sup>

# ED Fig 2C – actin

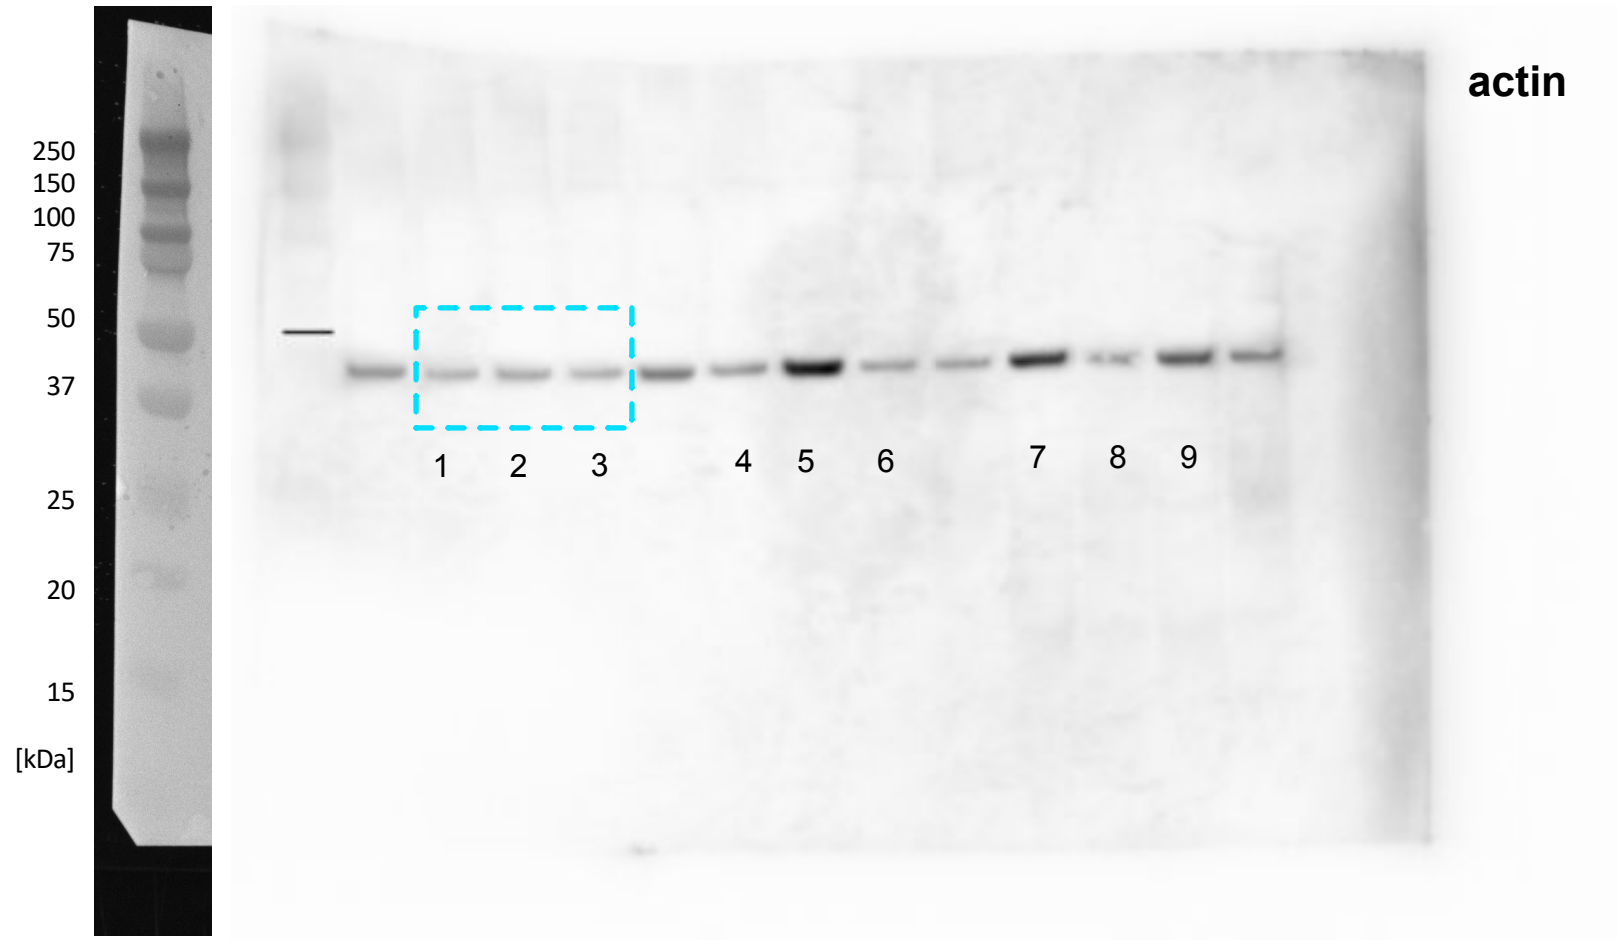

1, 4, 6: CAD5 + empty control plasmid  
2, 5, 7: CAD5 + mPrP<sup>C</sup>  
3, 6, 9: CAD5 + mPrP<sup>R207A</sup>
